# Supplementary material for: Differences of the inverted terrestrial ecosystem carbon flux between using GOSAT and OCO-2 XCO 2 retrievals
Source: Copernicus journal article supplement (doi:10.5194/acp-2018-1175), 2018-12-03
Supplement: Supplementary file [file acp-2018-1175-RC2-supplement.pdf]

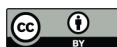

1 **I**  **ferences of the inverted terrestrial ecosystem carbon flux between using GO-**  
2 **SAT and OCO-2 XCO<sub>2</sub> retrievals**

3 Hengmao Wang<sup>1</sup>, Fei Jiang<sup>1,2\*</sup>, Jun Wang<sup>1</sup>, Weimin Ju<sup>1</sup>, Jing M. Chen<sup>1,3</sup>

4 *1 Jiangsu Provincial Key Laboratory of Geographic Information Science and Technology, International Institute for*  
5 *Earth System Science, Nanjing University, Nanjing, 210023, China*

6 *2 Jiangsu Center for Collaborative Innovation in Geographical Information Resource Development and Application,*  
7 *Nanjing, 210023, China*

8 *3, Department of Geography, University of Toronto, Toronto, Ontario M5S3G3, Canada*

9

10 **Abstract**

11 In this study, both the Greenhouse Gases Observing Satellite (GOSAT) and the Orbiting Car-  
12 bon Observatory 2 (OCO-2) XCO<sub>2</sub> retrievals are assimilated within the GEOS-Chem 4D-Var assim-  
13 ilation framework to constrain the terrestrial ecosystem carbon flux during Jul 1, 2014 to Dec 31,  
14 2015. The inverted global and regional carbon fluxes during Jan 1 to Dec 31, 2015 are shown and  
15 discussed. Surface CO<sub>2</sub> mixing ratios from 47 surface flask sites and XCO<sub>2</sub> measurements from 13  
16 TCCON sites are used to evaluate the simulated concentrations with the posteriori carbon fluxes. The  
17 results show that globally, the terrestrial ecosystem carbon sink (excluding biomass burning emis-  
18 sions) estimated from GOSAT data is stronger than that inferred from OCO-2 data, and the annual  
19 atmospheric CO<sub>2</sub> growth rate estimated from GOSAT data is more consistent with the estimate of  
20 GCP 2017. Regionally, in most regions, the land sinks inferred from GOSAT data are also stronger  
21 than those from OCO-2 data. Compared with the prior fluxes, the carbon fluxes in northern temperate  
22 regions change most, followed by tropical and southern temperate regions, and the smallest changes  
23 occur in boreal regions. Basically, in temperate regions, the inferred land sinks are significantly in-  
24 creased, while those in tropical regions are decreased. The different changes in different regions are  
25 mainly related to the spatial coverage and the amount of XCO<sub>2</sub> data in these regions. Compared with  
26 CT2016, the inferred carbon sinks are comparable in most temperate regions, but much weaker in

\* Corresponding author: Tel.: +86-25-83597077; Fax: +86-25-83592288; E-mail address: [jiangf@nju.edu.cn](mailto:jiangf@nju.edu.cn)



27 boreal and tropical regions. Evaluations using flask and TCCON observations suggest that GOSAT  
28 and OCO-2 data, can effectively improve the carbon flux estimates in the northern hemisphere, while  
29 in the southern hemisphere the optimized carbon sinks may be overestimated, especially for GOSAT  
30 data.

31 **Keywords:** Terrestrial ecosystem carbon flux, inversion, GOSAT, OCO-2, GEOS-Chem

32

### 33 1. Introduction

34 Atmospheric inverse modeling is an effective method for quantifying surface carbon fluxes at  
35 global and regional scales using the gradient of CO<sub>2</sub> measurements. Inversion studies based on in-  
36 situ CO<sub>2</sub> observations agree well on global carbon budget estimates but differ greatly on regional  
37 carbon flux estimates and the partitioning of land and ocean fluxes as well, mainly due to the sparse-  
38 ness of observations in tropics, southern hemisphere oceans and the majority of continental interiors  
39 such as those in South America, Africa, and Boreal Asia (Peylin et al., 2013). Satellite observations  
40 offer an attractive means to constrain atmospheric inversions with their extensive spatial coverage  
41 over remote regions. Studies have shown that satellite observations, though with lower precision than  
42 in-situ measurements, can improve the carbon flux estimates (Rayner and O'Brien, 2001; Pak and  
43 Prather, 2001; Houweling et al., 2004; Baker et al., 2006; Chevallier, 2007; Miller et al., 2007; Kady-  
44 grov et al., 2009; Hungershofer et al., 2010).

45 Satellite sensors designed specifically to measure atmospheric CO<sub>2</sub> concentrations, have been  
46 in operation in recent years. The Greenhouse Gases Observing Satellite (GOSAT) (Kuze et al.,  
47 2009), being the first satellite mission dedicated to observing CO<sub>2</sub> from space, was launched in  
48 2009. The National Aeronautics and Space Administration (NASA) launched the Orbiting Carbon  
49 Observatory 2 (OCO-2) satellite in 2014 (Crisp et al., 2017; Eldering et al., 2017). China's first CO<sub>2</sub>  
50 monitoring satellite (TanSat) was launched in 2016 (Wang et al., 2017; Yang et al., 2017). These sat-  
51 ellites measure near-infrared sunlight reflected from the surface in CO<sub>2</sub> spectral bands and the O<sub>2</sub>

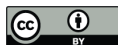

52 A-band to retrieve column-averaged dry-air mole fractions of CO<sub>2</sub> (XCO<sub>2</sub>), aiming to improving the  
53 estimation of spatial and temporal distributions of carbon sinks and sources. A number of inversions  
54 have utilized GOSAT XCO<sub>2</sub> retrievals to infer surface carbon fluxes (Takagi et al., 2011; Basu et  
55 al., 2013; Maksyutov et al., 2013; Saeki et al., 2013; Chevallier et al., 2014; Deng et al., 2014;  
56 Houweling et al., 2015; Deng et al., 2016). Although large uncertainty reductions were achieved  
57 for regions which are under-sampled by in-situ observations, these studies didn't give robust re-  
58 gional carbon flux estimates. There are large spreads in regional flux estimates in some regions  
59 among these inversions. Furthermore, regional flux distributions inferred from GOSAT XCO<sub>2</sub> data  
60 are significantly different from those inferred from in-situ observations. For instance, several stud-  
61 ies using GOSAT retrievals reported a larger than expected carbon sink in Europe (Basu et al.,  
62 2013; Chevallier et al., 2014; Deng et al., 2014; Houweling et al., 2015). The validity of this large  
63 Europe carbon sink derived from GOSAT retrievals is in intense debate and efforts to achieve a  
64 consensus estimate of Europe carbon sinks are still ongoing (Reuter et al., 2014; Feng et al., 2016;  
65 Reuter et al., 2017).

66 Compared with GOSAT, OCO-2 has a higher sensitivity near the surface, much finer footprints  
67 and more extended spatial coverage, and thus has the potential to better constrain the surface carbon  
68 flux inversion (Eldering et al., 2017). Studies have used OCO-2 XCO<sub>2</sub> data to estimate carbon flux  
69 anomalies during recent El Nino events (Chatterjee et al., 2017; Patra et al., 2017; Heymann et al.,  
70 2017; Liu et al., 2017). Nassar et al. (2017) applied OCO-2 XCO<sub>2</sub> data to infer emissions from large  
71 power plants. Miller et al. (2018) evaluated the potential of OCO-2 XCO<sub>2</sub> data in constraining re-  
72 gional biospheric CO<sub>2</sub> fluxes and found that in the current state of development, OCO-2 observa-  
73 tions can only provide a reliable constraint on CO<sub>2</sub> budget at continental and hemispheric scales. At  
74 present, it is still not clear whether with the improved monitoring capabilities, current OCO-2 ob-  
75 servations have a greater potential than GOSAT observations for estimating CO<sub>2</sub> flux at regional or

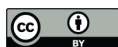

76 finer scale. It is therefore important to investigate how current OCO-2 XCO<sub>2</sub> data differ from GO-  
77 SAT XCO<sub>2</sub> data in constraining carbon budget.

78 In this study, we evaluate the performance of GOSAT and OCO-2 XCO<sub>2</sub> data in constraining  
79 terrestrial ecosystem carbon flux. GOSAT and OCO-2 XCO<sub>2</sub> retrievals produced by the NASA At-  
80 mospheric CO<sub>2</sub> Observations from Space (ACOS) team are applied to infer monthly terrestrial eco-  
81 system carbon sinks and sources from Oct, 2014 to December, 2015, using a 4D-Var scheme based  
82 on the GEOS-Chem Adjoint model. Inversion results are evaluated against surface flask CO<sub>2</sub> obser-  
83 vations and TCCON XCO<sub>2</sub> measurements. ~~We analyze the differences of inverted terrestrial ecosys-~~  
84 ~~tem carbon flux between using two XCO<sub>2</sub> data.~~ The inverted carbon fluxes are also compared with  
85 results from other datasets such as CarbonTracker CT2016 (Peters, et al., 2007) and Global Carbon  
86 Project (GCP) 2017 (Le Quéré et al., 2018). This paper is organized as follows. Section 2 briefly  
87 introduces GOSAT and OCO-2 XCO<sub>2</sub> retrievals and the inversion methodology and settings. Results  
88 and discussions are presented in Section 3, and Conclusions are given in Section 4.

89

## 90 **2. Data and Method**

### 91 2.1 GOSAT and OCO-2 XCO<sub>2</sub> retrievals

92 Developed jointly by the National Institute for Environmental Studies (NIES), the Japanese  
93 Space Agency (JAXA) and the Ministry of the Environment (MOE) of Japan, GOSAT was de-  
94 signed to measure total column abundances of CO<sub>2</sub> and CH<sub>4</sub>. The satellite flies at a 666 km altitude  
95 in a sun-synchronous orbit with 98° inclination that crosses the equator at 12:49 local time. It co-  
96 vers the whole globe in three days and has a footprint of 10.5 km<sup>2</sup> at nadir. OCO-2 is NASA's first  
97 mission dedicated to measuring atmospheric CO<sub>2</sub> concentration. It flies at 705 km altitude in a sun-  
98 synchronous orbit with an overpass time at approximately 13:30 local time and a repeat cycle of 16  
99 days. Its grating spectrometer measures reflected sunlight in three near-infrared regions (0.765, 1.61  
100 and 2.06 μm) to retrieve XCO<sub>2</sub>. OCO-2 has a footprint of 1.29×2.25 km<sup>2</sup> at nadir and acquires eight



101 cross-track footprints creating a swath width of 10.3 km.

102 Both GOSAT and OCO-2 XCO<sub>2</sub> products were created using the same retrieval algorithm,  
103 which is based on a Bayesian optimal estimation approach (Roggers et. al., 2000; O Dell et. al.,  
104 2011). The GOSAT and OCO-2 XCO<sub>2</sub> data used in this study are Version 7.3 Level 2 Lite products  
105 at the pixel level. The XCO<sub>2</sub> data from lite products are bias-corrected (Wunch et. al., 2011). Before  
106 used in our inversion system, the data are processed in three steps. First, the retrievals for the glint  
107 soundings over oceans have relatively larger uncertainty, thus the data over oceans are not used in  
108 our inversions (Wunch et. al., 2017). Second, in order to achieve the most extensive spatial cover-  
109 age with the assurance of using best quality data available, the XCO<sub>2</sub> data are filtered with two pa-  
110 rameters, namely warn\_levels and xco2\_quality\_flag, which are provided along with the XCO<sub>2</sub>  
111 data. All data with xco2\_quality\_flag not equaling 0 are removed, the rest are divided into three  
112 groups according the value of warn\_levels, namely group 1, group 2 and group 3. In group 1, the  
113 warn\_levels are less than 8, in group 2, the warn\_levels are greater than 9 and less than 12, and in  
114 group 3, those are greater than 13. Group 1 has the best data quality, followed by group 2, and  
115 group 3 is the worst. Third, the pixel data are averaged within the grid cell of 2°×2.5°, which is the  
116 resolution of the global atmospheric transport model used in this study. In each grid of 2°×2.5°,  
117 only the groups of best data quality are selected and then averaged. The other variables like column  
118 averaging kernel, retrieval error and so on which are provided along with the XCO<sub>2</sub> product are also  
119 dealt with the same method. Figures 1a and 1b show the coverages and data amount of GOSAT  
120 and OCO-2 XCO<sub>2</sub> data during the study period after processing.

121

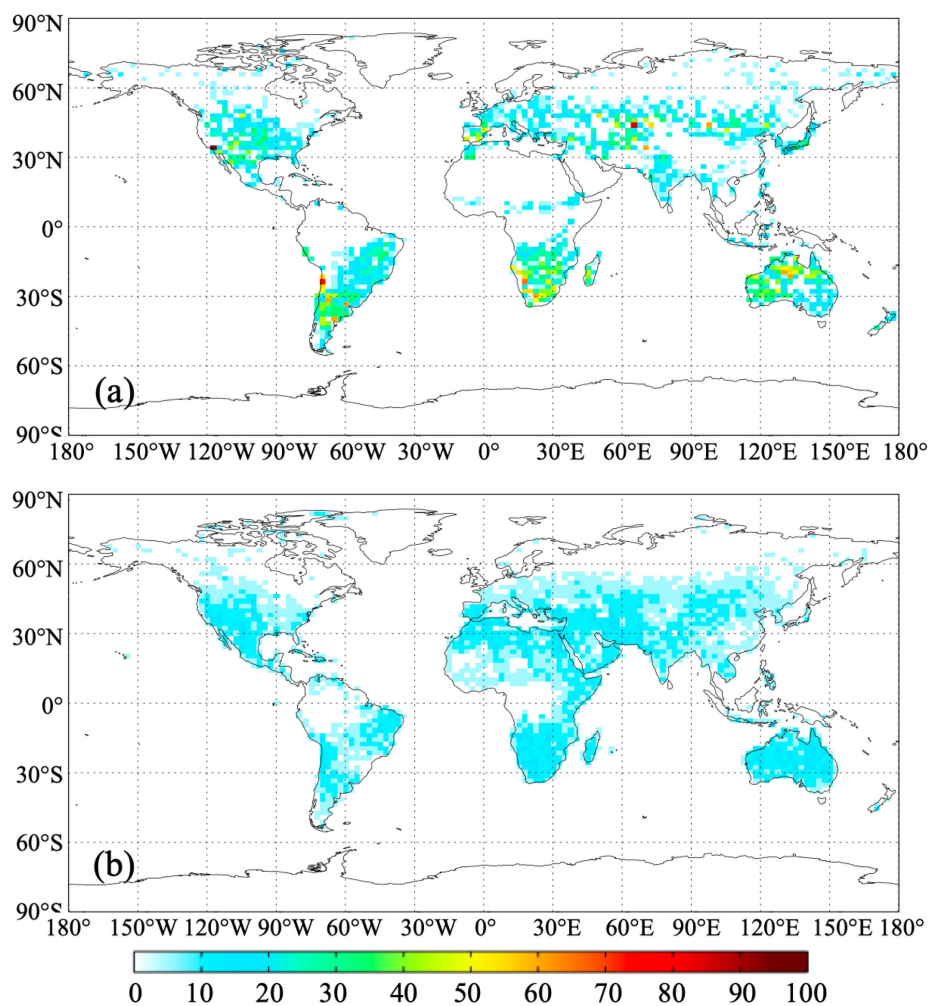

122

123 **Figure 1.** Data amount of each grid cell (2°x2.5°) of ACOS XCO<sub>2</sub> used in this study (a, GOSAT; b,  
124 OCO-2)

## 125 2.2 Surface flask and TCCON CO<sub>2</sub> measurements

126 We evaluate the inversion results through comparing the modeled CO<sub>2</sub> mixing ratios using the  
127 posteriori fluxes with surface flask measurements and Total Carbon Column Observing Network  
128 (TCCON) XCO<sub>2</sub> observations. The flask measurements of CO<sub>2</sub> mixing ratios are downloaded from  
129 World Data Center for Greenhouse Gases (WDCGG) under the World Meteorological Organization  
130 (WMO) Global Atmospheric Watch (GAW) programme (<http://ds.data.jma.go.jp/gmd/wdcgg/>). 47

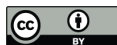

131 surface sites which have valid observations for at least two months in 2015 are chosen. TCCON is a  
132 network of ground-based Fourier Transform Spectrometers that measure direct near-infrared solar  
133 absorption spectra. Column-averaged abundances of atmospheric constituents including CO<sub>2</sub>, CH<sub>4</sub>,  
134 N<sub>2</sub>O, HF, CO, H<sub>2</sub>O, and HDO are retrieved through these spectra. We use XCO<sub>2</sub> retrievals from 13  
135 stations from TCCON GGG2014 dataset (Blumenstock et al., 2017; Deutscher et al., 2017; Griffith  
136 et al., 2017a, b; Kivi et al., 2017; Morino et al., 2017; Notholt et al., 2017a, b; Sherlock et al., 2017;  
137 Sussmann and Rettinger, 2017; Warneke et al., 2017; Wennberg et al., 2017a, b). The locations of  
138 47 flask sites and 13 TCCON stations are shown in Figure 2.

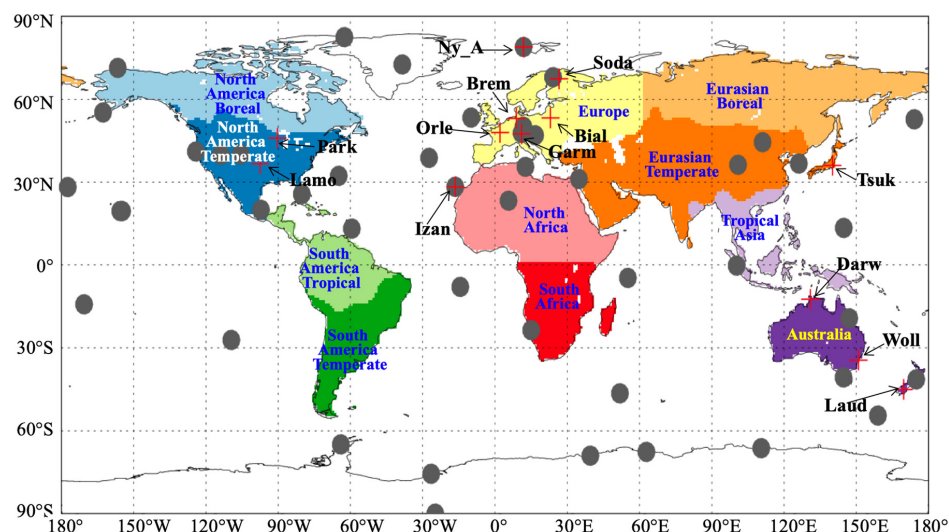

139  
140 **Figure 2.** Distributions of the 47 surface flask sites (gray solid circle) and 13 TCCON sites (red  
141 cross mark), shaded shows the 11 TRANSKOM regions

### 142 2.3 GEOS-Chem 4DVAR assimilation framework

143 In this work, bias-corrected XCO<sub>2</sub> retrievals are assimilated to estimate monthly terrestrial eco-  
144 system carbon fluxes using the GEOS-Chem and its adjoint model in a 4D-Var assimilation frame-  
145 work.

#### 146 2.3.1 GEOS-Chem model

147 GEOS-Chem model (<http://geos-chem.org>) is a global three-dimensional chemistry transport



148 model (CTM), which is driven by assimilated meteorological data from the Goddard Earth Observ-  
149 ing System (GEOS) of the NASA Global Modeling and Assimilation Office (GMAO) (Rienecker et  
150 al., 2008). The original CO<sub>2</sub> simulation in the GEOS-Chem model was developed by Suntharalin-  
151 gam *et al.* (2004) and accounts for CO<sub>2</sub> fluxes from fossil fuel combustion and cement production,  
152 biomass burning, terrestrial ecosystem exchange, ocean exchange and biofuel burning. Nassar et al.  
153 (2010) updated the CO<sub>2</sub> simulation with improved inventories. In addition to the inventories in ear-  
154 lier version, the new CO<sub>2</sub> fluxes includes CO<sub>2</sub> emissions from international shipping, aviation (3D)  
155 and the chemical production of CO<sub>2</sub> from CO oxidation throughout the troposphere. In most other  
156 models, the oxidation of CO was treated as direct surface CO<sub>2</sub> emissions. The details of the CO<sub>2</sub>  
157 simulation and the CO<sub>2</sub> sinks/sources inventories could be found in Nassar et al. (2010). The ver-  
158 sion of GEOS-Chem model used in this study is v8-02-01.

### 159 2.3.2 GEOS-Chem adjoint model

160 An adjoint model is used to calculate the gradient of a response function of one model scalar  
161 (or cost function) with respect to a set of model parameters. The adjoint of the GEOS-Chem model  
162 was first developed for inverse modeling of aerosol (or their precursors) and gas emissions (Henze  
163 et al., 2007). It has been implemented to constrain sources of species such as CO, CH<sub>4</sub>, and O<sub>3</sub> with  
164 satellite observations (Kopacz et al., 2009, 2010; Jiang et al., 2011; Wecht et al., 2012; Parrington et  
165 al., 2012). Several studies have successfully used this adjoint model to constraint carbon sources  
166 and sinks with surface flask measurements of CO<sub>2</sub> mixing ratio and space-based XCO<sub>2</sub> retrievals  
167 (Deng et al., 2014; Liu et al., 2014; Deng et al., 2016; Liu et al., 2017).

### 168 2.3.3 Inversion method

169 In the GEOS-Chem inverse modeling framework, the 4D-Var data assimilation technique is  
170 employed for combining observations and simulations to seek a best optimal estimation of the state  
171 of a system. This approach seeks the scaling factors of the carbon flux that minimize the cost func-  
172 tion,  $J$ , given by:





$$173 \quad J(c) = \frac{1}{2} \sum_{i=1}^N (XCO_{2,i}^m - XCO_{2,i}^{obs}) S_{obs,i}^{-1} (XCO_{2,i}^m - XCO_{2,i}^{obs}) + \frac{1}{2} (c - c_a) S_c^{-1} (c - c_a)$$

174 where  $N$  is total number of satellite  $XCO_2$  observations;  $XCO_2^m$  and  $XCO_2^{obs}$  are modeled and ob-  
 175 served total column averaged dry air mole fraction of  $CO_2$  respectively;  $c_a$  is the priori scaling factor  
 176 of the carbon flux, which is typically set as unity;  $S_{obs}$  is the model-data mismatch error covariance  
 177 matrix;  $S_c$  is the scaling factor error covariance matrix. The gradients of the cost function with re-  
 178 spect to scaling factors calculated with the adjoint model are supplied to an optimization routine  
 179 (the L-BFGS-B optimization routine; Byrd et al., 1995; Zhu et al., 1994), and the minimum of the  
 180 cost function is sought iteratively.

181 For the modeled  $CO_2$  column to be comparable with the satellite  $XCO_2$  retrievals, the modeled  
 182  $CO_2$  concentration profile should be first mapped into the satellite retrieval levels and then convo-  
 183 luted with retrieval averaging kernels. The modeled  $XCO_2$  is computed by:

$$184 \quad XCO_2^m = XCO_2^a + \sum_j h_j a_j (A(x) - y_{a,j})$$

185 where  $j$  denotes retrieval level,  $x$  is the modeled  $CO_2$  profile;  $A(x)$  is a mapping matrix;  $XCO_2^a$  is a  
 186 priori  $XCO_2$ ,  $h_j$  is pressure weighting function,  $a_j$  is the satellite column averaging kernel and  $y_a$  is  
 187 the priori  $CO_2$  profile for retrieval.

### 188 3. Inversion settings

189 In this study, the GEOS-Chem model was run in a horizontal resolution of  $2^\circ \times 2.5^\circ$  for 47 verti-  
 190 cal layers. Two experiments, one with GOSAT data and the other with OCO-2 data, were conducted  
 191 from Oct 1, 2014 to December 31, 2015. The posteriori dry air mole fraction of  $CO_2$  of Oct 1, 2014  
 192 from CT2016 product was taken as the initial concentration. The first three months were taken as  
 193 the spin-up period. The priori carbon fluxes used in this study include: fossil fuel and cement manu-  
 194 facture  $CO_2$  emissions from the Carbon Dioxide Information Analysis Center (CDIAC) (Andres et



195 al., 2011), biomass burning CO<sub>2</sub> emissions from the Global Fire Emissions Database version 4.1  
196 (GFEDv4) (van der Werf et al., 2010; Giglio et al., 2013); terrestrial ecosystem carbon exchanges  
197 from the Carnegie-Ames-Stanford Approach (CASA) model GFED4.1 simulation (Potter et al.,  
198 1993; van der Werf et al., 2010); CO<sub>2</sub> exchanges over the ocean surface from the posteriori air-sea  
199 CO<sub>2</sub> flux from CT2016 (Peters *et al.* 2007, with updates documented at [http://carbon-](http://carbon-tracker.noaa.gov)  
200 [tracker.noaa.gov](http://carbon-tracker.noaa.gov)); monthly shipping emissions of CO<sub>2</sub> from the International Comprehensive  
201 Ocean–Atmosphere Data Set (ICOADS) (Corbett and Koehler, 2003; Endresen et al., 2004, 2007);  
202 3-D aviation CO<sub>2</sub> emissions (Kim et al., 2007; Wilkerson et al., 2010); and 3-D chemical produc-  
203 tion of CO<sub>2</sub> from the oxidation of other atmospheric carbon species and its surface corrections (Nas-  
204 sar et al., 2010). It is noted that the terrestrial ecosystem CO<sub>2</sub> exchanges, fossil fuel and cement  
205 manufacture emissions and biomass burning emissions in our inversions are the same as those in  
206 CT2016. Since we exclude XCO<sub>2</sub> retrievals over ocean, in our inversions, the terrestrial ecosystem  
207 exchanges might compensate for the under-constrained ocean CO<sub>2</sub> fluxes. To mitigate the impact of  
208 the lack of XCO<sub>2</sub> observations over ocean, we directly use the posteriori ocean CO<sub>2</sub> fluxes of  
209 CT2016, which were well constrained with surface flask observations at ocean sites. Only terres-  
210 trial ecosystem CO<sub>2</sub> exchanges are optimized in our inversions.

211 An efficient computational procedure for constructing non-diagonal priori flux error covariance  
212 matrix which accounts for the spatial correlation of errors is implemented (Single et al, 2011). The  
213 construction is based on the assumption of exponential decay of error correlations. Other than form-  
214 ing covariance matrix explicitly, multiple-dimensional correlations are represented by tensor prod-  
215 ucts of one dimensional correlation matrices along longitude and latitudinal directions. For the two  
216 inversions, the scale lengths assigned along longitudinal and latitudinal directions are 500 km and  
217 400 km for terrestrial ecosystem exchange and 1000 km and 800 km for ocean exchange, respec-  
218 tively. No correlations between different types of fluxes are assumed. The temporal correlations are  
219 also neglected. Global annual uncertainty of 100% and 40% are assigned for terrestrial ecosystem



220 and ocean CO<sub>2</sub> exchanges, respectively (Deng and Chen, 2011). Accordingly, the ratios of uncer-  
221 tainty to the priori land and ocean fluxes in each month at the grid cell level are assigned with 5 and  
222 3, respectively.

223 The observation error covariance matrix is constructed using the retrieval error, which is pro-  
224 vided along with the XCO<sub>2</sub> data. Observation errors are assumed to be uncorrelated at model grid  
225 level. To account for the correlated observation errors, as shown in section 2.1, the pixel level re-  
226 trieval errors are filtered and averaged to model at the grid level, and then inflated by a factor of 1.9  
227 to ensure the chi-square testing of  $\chi^2$  value to be close to 1 (Tarantola, 2004; Chevallier et al.,  
228 2007).

## 229 4. Results and Discussions

### 230 4.1 Global carbon budget

231 Table 1 presents the optimized global carbon budgets by the two experiments in 2015. For com-  
232 parison purposes, the prior fluxes used in this study and the estimates of CT2016 and GCP2017 are  
233 also shown in Table 1. The optimized global land sinks based on GOSAT and OCO-2 XCO<sub>2</sub> retriev-  
234 als are -3.48 and -2.94 PgC yr<sup>-1</sup>, respectively, which are larger than the prior value, but lower than  
235 the CT2016 estimate based on the flask/in-situ CO<sub>2</sub> concentration observations. The differences of  
236 ocean fluxes among a priori and two inversions are small since we don't assimilate XCO<sub>2</sub> data over  
237 ocean. GCP gives a comprehensive estimate for the global carbon budget every year. In the GCP  
238 2017 estimates, the components of the global carbon budget include fossil fuel and industry, land-  
239 use change emissions, atmospheric growth, ocean sink, land sink, and budget imbalance, which are  
240 different from those in this study and CT2016 (Table 1). For ease of comparison, the budget imbal-  
241 ance, land sink and land-use change emissions are combined as land net flux, and then the biomass  
242 burning emissions and the land sink in this study and those from CT2016 are combined to obtain  
243 the land net flux. As shown in Table 1, the prior estimate gives the smallest net land flux (-0.5 Pg C  
244 yr<sup>-1</sup>), and the CT2016 estimate is the largest (-1.7 PgC yr<sup>-1</sup>). The land net flux optimized based on



245 GOSAT and OCO-2 XCO<sub>2</sub> retrievals fall in between (-0.74 and -1.28 PgC yr<sup>-1</sup>, respectively), and  
 246 are much closer to the estimate of GCP 2017 (-1.03 PgC yr<sup>-1</sup>). A global net flux from GCP is in-  
 247 ferred from the global annual atmospheric carbon growth rate, which represents relatively accu-  
 248 rately the net carbon flux added into atmosphere. It could be found that the global net flux esti-  
 249 mated based on GOSAT data is the closest to the GCP estimate, while the one estimated using  
 250 OCO-2 data is higher and the CT2016 estimate is much lower than the GCP result, indicating that  
 251 the land and ocean carbon uptakes in CT2016 were overestimated, while those optimized using  
 252 OCO-2 data might be underestimated.

253 **Table 1.** Global carbon budgets estimated by the OCO-2 experiment, GOSAT experiment in this  
 254 study as well as those from the priori fluxes, CT2016 and GCP2017 (PgC yr<sup>-1</sup>)

|                           | Priori | OCO-2 ex-<br>periment | GOSAT ex-<br>periment | CT2016 | GCP2017             |
|---------------------------|--------|-----------------------|-----------------------|--------|---------------------|
| Fossil fuel and industry  | 9.83   | 9.83                  | 9.83                  | 9.83   | 9.83                |
| Biomass burning emissions | 2.2    | 2.2                   | 2.2                   | 2.2    | 1.52 <sup>a)</sup>  |
| Land sink                 | -2.5   | -2.94                 | -3.48                 | -3.9   | -2.55 <sup>b)</sup> |
| Land net flux             | -0.5   | -0.74                 | -1.28                 | -1.7   | -1.03               |
| Ocean sink                | -2.41  | -2.43                 | -2.45                 | -2.41  | -2.57               |
| Global net flux           | 7.12   | 6.66                  | 6.1                   | 5.72   | 6.23 <sup>c)</sup>  |

255 <sup>a)</sup> land-use change emissions in GCP2017

256 <sup>b)</sup> land sink plus budget imbalance

257 <sup>c)</sup> atmospheric growth

## 258 4.2 Regional carbon flux

259 Figure 3 shows the distributions of annual land and ocean carbon fluxes (excluding fossil fuel  
 260 and biomass burning carbon emissions, same thereafter) of the prior and the estimates using GOSAT  
 261 and OCO-2 data. It could be found that compared with the prior fluxes, the carbon sinks in Central  
 262 America, south and northeast China, east and central Europe, south Russia and east Brazil are obvi-  
 263 ously increased in GOSAT inversion. Except for east Brazil, the land sinks in those areas in OCO-2  
 264 inversion are also increased, but much weaker than those in GOSAT inversion, and in east Brazil, it



265 turns to a significant carbon source. In contrast, in east and central Canada, north Russia, north Eu-  
266 rope, west Indo-China Peninsula, north Democratic Republic of the Congo and west Brazil, their  
267 carbon sources are significantly increased in both GOSAT and OCO-2 inversions. In east and central  
268 Canada, north Europe and west Brazil, there are much stronger carbon sources in OCO-2 inversion.

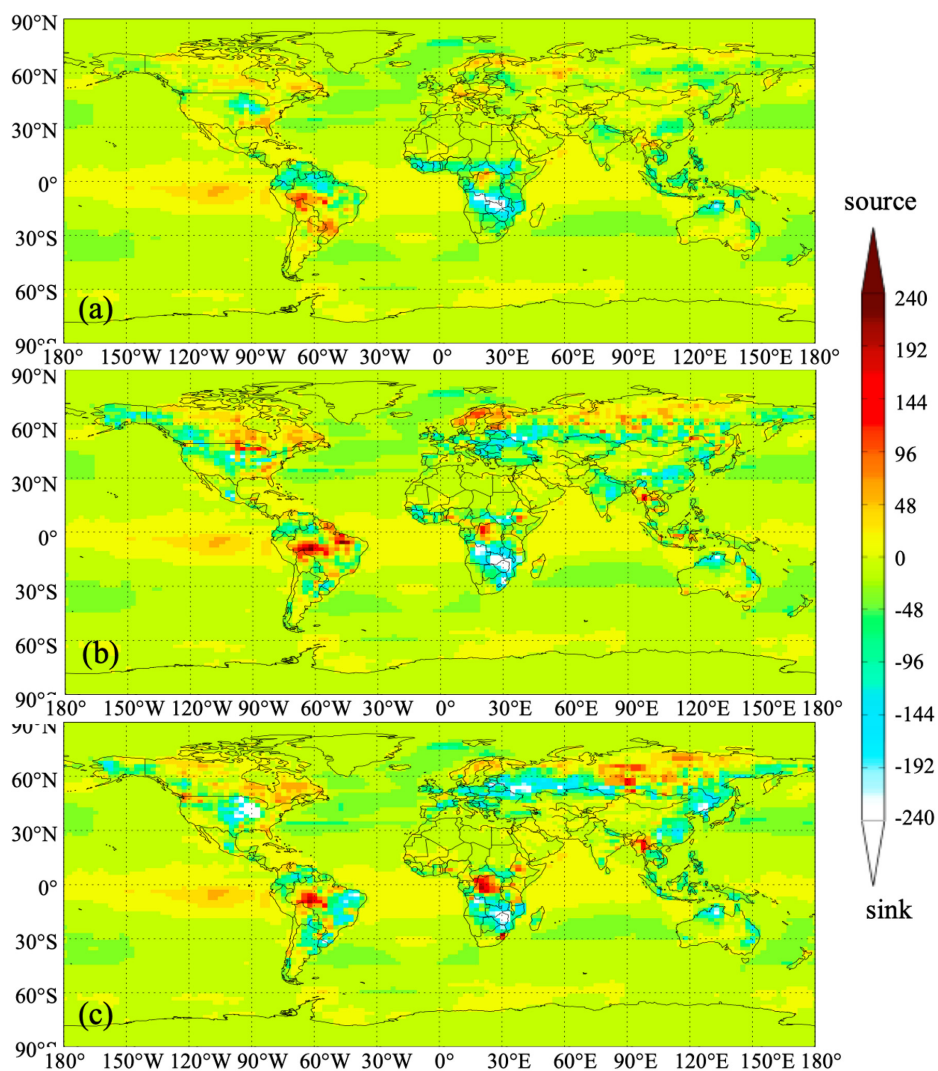

269

270 **Figure 3.** Distributions of annual land and ocean carbon fluxes a) priori flux and posteriori fluxes  
271 based on (b) OCO-2 and (c) GOSAT data ( $\text{gC m}^{-2}\text{yr}^{-1}$ )

272

273 To better investigate the differences between GOSAT and OCO-2 inversions as well as their



274 differences with the prior fluxes, we aggregate the prior and inferred land fluxes into 11 TRANSCOM  
275 land regions (ref.??). Figure 4 shows aggregated annual land surface fluxes from the prior, GOSAT  
276 and OCO-2 inversions for the 11 land regions. For comparison purposes, the optimized surface fluxes  
277 in CT2016 are also aggregated and shown in Figure 4.

278 **Clearly,** ~~in most regions, the land sinks inverted based on GOSAT data are stronger than those~~  
279 ~~inferred from OCO-2 data. In Northern Temperate and Southern Temperate Lands (i.e., North Amer-~~  
280 ~~ica Temperate, Eurasian Temperate, Europe, South America Temperate, South Africa and Australia),~~  
281 ~~except for Eurasian Temperate and South Africa, the inferred land sinks using GOSAT XCO<sub>2</sub> are~~  
282 ~~much stronger than those optimized using OCO-2 data. For example, in North America Temperate,~~  
283 ~~the carbon sink of GOSAT experiment (-0.5 Pg C yr<sup>-1</sup>) is about twice that of the OCO-2 inversions (-~~  
284 ~~0.27 Pg C yr<sup>-1</sup>); and in South America Temperate, the estimated land sink based on GOSAT data (-~~  
285 ~~0.47 Pg C yr<sup>-1</sup>) is about 4 times as large as the OCO-2 inversions (-0.12 Pg C yr<sup>-1</sup>). For the total~~  
286 ~~Temperate Land, the optimized land sinks based on GOSAT and OCO-2 XCO<sub>2</sub> retrievals are -2.95~~  
287 ~~and -2.59 Pg C yr<sup>-1</sup>, respectively (Table 2). In the tropics (i.e., South America Tropical, North Africa,~~  
288 ~~and Tropical Asia), except for North Africa, the carbon sinks inferred from GOSAT data are also~~  
289 ~~larger than those estimated using OCO-2 data. In Tropical Asia, the estimated land sink based on~~  
290 ~~GOSAT data (-0.28 Pg C yr<sup>-1</sup>) is about 2 times of the OCO-2 inversions (-0.13 Pg C yr<sup>-1</sup>); in South~~  
291 ~~America Tropical, the OCO-2 inversion result is a carbon source of 0.19 PgC yr<sup>-1</sup>, while GOSAT~~  
292 ~~inversion gives a weak sink of -0.05 Pg C yr<sup>-1</sup>. The total carbon sinks in tropical land inverted from~~  
293 ~~GOSAT and OCO-2 data are -0.36 and -0.20 Pg C yr<sup>-1</sup>, respectively. In Northern Boreal Land, in-~~  
294 ~~cluding North America Boreal and Eurasian Boreal, the total carbon sinks inverted with GOSAT (-~~  
295 ~~0.18 Pg C yr<sup>-1</sup>) and OCO-2 (-0.16 Pg C yr<sup>-1</sup>) data are comparable. However, the two XCO<sub>2</sub> data have~~  
296 ~~opposite performances in these two areas, namely in Eurasian Boreal, the inverted land sink with~~  
297 ~~GOSAT is stronger than that with OCO-2; while in North America Boreal, it is the opposite.~~



298 ~~For different continents (Table 2), in Asia and Australia, their carbon sinks inverted from GO-~~  
299 ~~SAT and OCO-2 data are comparable. In North America, South America and Europe, the land sinks~~  
300 ~~in GOSAT inversion are much stronger than those in OCO-2 inversion. Especially in South America,~~  
301 ~~the GOSAT inversion result is a strong carbon sink ( $-0.51 \text{ Pg C yr}^{-1}$ ), while in OCO-2 inversion, it is~~  
302 ~~a weak carbon source ( $0.06 \text{ Pg C yr}^{-1}$ ). Conversely, in Africa, the land sink estimated with GOSAT~~  
303 ~~data is much weaker than those from OCO-2 data, the former ( $-0.59 \text{ Pg C yr}^{-1}$ ) being only about the~~  
304 ~~half of the latter ( $-1.13 \text{ Pg C yr}^{-1}$ ).~~

305 ~~Compared with the prior fluxes, basically, the inferred land fluxes in Northern Temperate re-~~  
306 ~~gions have largest changes, followed by those in Tropical regions and Southern Temperate lands,~~  
307 ~~while in boreal regions, the changes are weakest. Basically, in temperate regions, the inferred land~~  
308 ~~sinks are significantly increased, while those in tropical regions are decreased. In boreal regions, the~~  
309 ~~changes using two XCO<sub>2</sub> data are not consistent. As shown in Table 3, in Northern Temperate Land,~~  
310 ~~the increases of carbon sinks constrained by OCO-2 and GOSAT reach to  $1.03$  and  $1.33 \text{ Pg C yr}^{-1}$ ,~~  
311 ~~respectively, while in Tropical Land, the enhancements of carbon sources are  $0.82$  and  $0.66 \text{ Pg C yr}^{-1}$ ,~~  
312 ~~respectively, whereas in Northern Boreal Land, the changes caused by the two XCO<sub>2</sub> data are only~~  
313  ~~$0.005$  and  $-0.015 \text{ Pg C yr}^{-1}$ . For different TRANSCOM regions and different XCO<sub>2</sub> used, the changes~~  
314 ~~of carbon fluxes have large differences. When using GOSAT data, Europe has the largest change in~~  
315 ~~the carbon flux ( $-0.63 \text{ Pg C yr}^{-1}$ ), followed by South America Temperate ( $-0.50 \text{ Pg C yr}^{-1}$ ) and North~~  
316 ~~America Temperate ( $-0.41 \text{ Pg C yr}^{-1}$ ); when using OCO-2 data, the largest carbon sink changes are in~~  
317 ~~South America Tropical ( $0.46 \text{ Pg C yr}^{-1}$ ) and Eurasian Temperate ( $-0.46 \text{ Pg C yr}^{-1}$ ), followed by Eu-~~  
318 ~~rope ( $-0.39 \text{ Pg C yr}^{-1}$ ). Since the same setup used in these two inversions and the same algorithm~~  
319 ~~adopted for retrieving XCO<sub>2</sub> from GOSAT and OCO-2 measurements, the different impacts of XCO<sub>2</sub>~~  
320 ~~data on land sinks may be related to the spatial coverage and the amount of data in these two XCO<sub>2</sub>~~  
321 ~~datasets. As shown in Figure 1, in different latitude zones, the spatial coverage and the data amount~~  
322 ~~of GOSAT and OCO-2 have large differences. Statistics show that basically, the amount of data is~~



323 largest in northern temperate land, followed by southern temperate land and tropical land, and least  
324 in northern boreal regions, corresponding to the magnitude of changes of carbon fluxes in these zones.  
325 For one specific zone, the different impacts of these two XCO<sub>2</sub> datasets may be also related to their  
326 data amount. For example, in northern temperate land, GOSAT has more XCO<sub>2</sub> data than OCO-2.  
327 Accordingly, the change of carbon flux caused by GOSAT is larger than that caused by OCO-2. Con-  
328 versely, in Tropical Land, OCO-2 has more data than GOSAT, and as shown before it has more sig-  
329 nificant impact on the land sink. This relationship could also be found in each TRANSCOM region.  
330 Figure 5 gives a relationship between the XCO<sub>2</sub> data amount ratios of GOSAT to OCO-2 and the land  
331 sinks absolute change ratios caused by GOSAT to OCO-2 for 11 TRANSCOM land regions. Obvi-  
332 ously, except for North and South Africa, there is a significant linear correlation (R=0.95) between  
333 these two ratios, suggesting that the more XCO<sub>2</sub> data, the more carbon flux is changed. In North  
334 Africa, we find that OCO-2 has better spatial coverage and more data than GOSAT, as shown in  
335 Figure 1, although the differences mainly occur in the Sahara where the carbon flux is very weak, but  
336 near the equatorial region where the carbon flux is large, OCO-2 still has more data than GOSAT; in  
337 southern Africa, both XCO<sub>2</sub> have good spatial coverage, the amount of GOSAT data is about 1.5  
338 times that of OCO-2, but the changes in the carbon flux caused by GOSAT is about 10 times that of  
339 OCO-2. This indicates that in addition to the spatial coverage and the amount of data, the instrument  
340 characteristics such as sensor accuracy and spatial resolution may also have impact on the inversion  
341 results.

342 Compared with the CT2016 results, in temperate regions, except for Australia and Europe, the  
343 carbon sinks estimated from the two XCO<sub>2</sub> datasets in this study are basically comparable with those  
344 inferred based on surface observations in ~~CT2016~~. In Australia and Europe, the inverted carbon sinks  
345 with XCO<sub>2</sub> data in this study are both much stronger than CT2016. Especially in Europe, the CT2016  
346 estimate is a significant source of 0.26 Pg C, whereas our inversions suggest a strong carbon sink  
347 ranging between -0.40 and -0.63 Pg C yr<sup>-1</sup>. Although previous studies (Basu et al., 2013; Chevallier





348 et al., 2014; Deng et al., 2014; Houweling et al., 2015) also showed enhanced carbon uptake in Europe  
349 using GOSAT data, but until now, the strong Europe uptake as inferred from satellite data is still in  
350 intense debate (Reuter et al., 2014; Feng et al., 2016; Reuter et al., 2017). Examination of the seasonal  
351 variation of the inverted fluxes in Europe shows that during the growing season, both CT2016 and  
352 our inversions estimate similar carbon uptake, whereas in the non-growing season, CT2016 produces  
353 more carbon release than our inversions. Since there are few satellite measurements in Europe during  
354 the dormant season, the carbon release by respiration might not be well constrained by satellite data  
355 but close to the prior value.

356 In boreal regions, the inverted land sinks of CT2016 are significantly stronger than those in this  
357 study, especially in the Eurasian Boreal, where the carbon uptake estimated by CT2016 is almost 1  
358 Pg C yr<sup>-1</sup> larger than our estimates. One explanation for the large sink in CT2016 in this area is that  
359 there is a mutual compensation for carbon sinks between Europe and Eurasian Boreal because of the  
360 large differences in the amount of observations between these two areas. Kim et al. (2017) found that  
361 with the addition of Siberian in-situ measurements to their inversion system, the carbon uptake in  
362 Europe was enhanced while it decreased in the boreal Eurasian. Saeki et al. (2013) also reported that  
363 more CO<sub>2</sub> observations over Siberian used in the inversion system would weaken the summer carbon  
364 uptake in this area. These studies indicate that for CT2016, the carbon sink in Europe may be under-  
365 estimated, while in boreal Eurasian, it may be significantly overestimated. Since there are only very  
366 few XCO<sub>2</sub> observations from both GOSAT and OCO-2 in this area, our estimates are very close to  
367 the prior and much weaker than those found by Saeki et al. (2013) and Kim et al. (2017), indicating  
368 that the land sink in the Eurasian Boreal is underestimated in this study. Combined the land sinks of  
369 Europe and Eurasian Boreal, the inverted land sinks of GOSAT (-0.86 Pg C yr<sup>-1</sup>) is comparable with  
370 CT2016 (-0.92 Pg C yr<sup>-1</sup>), indicating that the land sink in Europe inferred from GOSAT may be also  
371 overestimated to a certain extent.

372 In the tropical regions, the inverted land sinks of CT2016 are also all much stronger than our



373 estimates, but the differences between the inverted and the prior fluxes in CT2016 are significantly  
374 smaller than those in this study, mainly because of the lack of surface CO<sub>2</sub> observations in tropical  
375 areas, especially in Tropical Asia.

376 For different continents (Table 2), the largest difference between this study and CT2016 is found  
377 in Asia. Using an ensemble of seven atmospheric inverse systems, Thompson et al. (2016) reported  
378 that the Asian land biosphere CO<sub>2</sub> flux (including land-use change and fires) was a net sink of -0.46  
379 (-0.70~0.24) Pg C yr<sup>-1</sup> (median and range) for 1996–2012. The land biosphere CO<sub>2</sub> fluxes (also in-  
380 cluding biomass burning emissions) estimated based on OCO-2 and GOSAT in this study are -0.37  
381 and -0.42 Pg C yr<sup>-1</sup>, respectively, which are comparable with the result of Thompson et al. (2016).

382

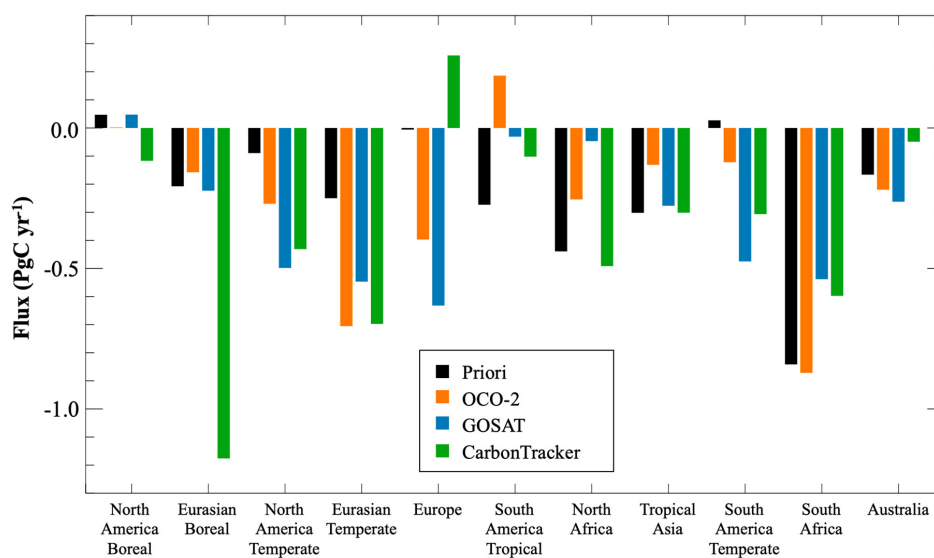

383

384 **Figure 4.** Aggregated annual land fluxes of the 11 TRANSKOM land regions

385

386

387

388


 389 **Table 2.** The priori and posteriori fluxes in six continents and boreal, temperate and tropical lands

| Regions                 | Prior | OCO-2 | GOSAT | CT2016 |
|-------------------------|-------|-------|-------|--------|
| North America           | -0.04 | -0.27 | -0.45 | -0.55  |
| South America           | -0.25 | 0.06  | -0.51 | -0.41  |
| Europe                  | -0.01 | -0.40 | -0.63 | 0.26   |
| Asia                    | -0.76 | -0.99 | -1.05 | -2.18  |
| Africa                  | -1.28 | -1.13 | -0.59 | -1.09  |
| Australia               | -0.17 | -0.22 | -0.26 | -0.05  |
| Northern Boreal Land    | -0.16 | -0.16 | -0.18 | -1.29  |
| Northern Temperate Land | -0.35 | -1.37 | -1.68 | -0.87  |
| Tropical Land           | -1.01 | -0.20 | -0.36 | -0.90  |
| Southern Temperate Land | -0.98 | -1.21 | -1.28 | -0.95  |

390

 391 **Table 3.** Differences between the inferred and the prior carbon fluxes, and the data amount of XCO<sub>2</sub>  
 392 in different regions

| Region                  | Differences (Pg C yr <sup>-1</sup> ) |       | XCO <sub>2</sub> data amount |       |
|-------------------------|--------------------------------------|-------|------------------------------|-------|
|                         | OCO-2                                | GOSAT | OCO-2                        | GOSAT |
| North America Boreal    | -0.05                                | 0.00  | 1143                         | 639   |
| North America Temperate | -0.18                                | -0.41 | 2390                         | 3163  |
| South America Tropical  | 0.46                                 | 0.24  | 800                          | 421   |
| South America Temperate | -0.15                                | -0.50 | 1711                         | 3500  |
| North Africa            | 0.19                                 | 0.39  | 3208                         | 674   |
| South Africa            | -0.03                                | 0.30  | 2057                         | 3060  |
| Eurasian Boreal         | 0.05                                 | -0.02 | 1714                         | 1339  |
| Eurasian Temperate      | -0.46                                | -0.30 | 5323                         | 4782  |
| Tropical Asia           | 0.17                                 | 0.03  | 726                          | 550   |
| Australia               | -0.05                                | -0.10 | 2011                         | 3110  |
| Europe                  | -0.39                                | -0.63 | 1604                         | 2106  |
| Global land             | -0.44                                | -0.98 | 22687                        | 23344 |
| Northern Boreal Land    | 0.005                                | -0.02 | 2857                         | 1978  |
| Northern Temperate Land | -1.03                                | -1.33 | 9317                         | 10051 |
| Tropical Land           | 0.82                                 | 0.66  | 4734                         | 1645  |
| Southern Temperate Land | -0.23                                | -0.30 | 5779                         | 9670  |



393

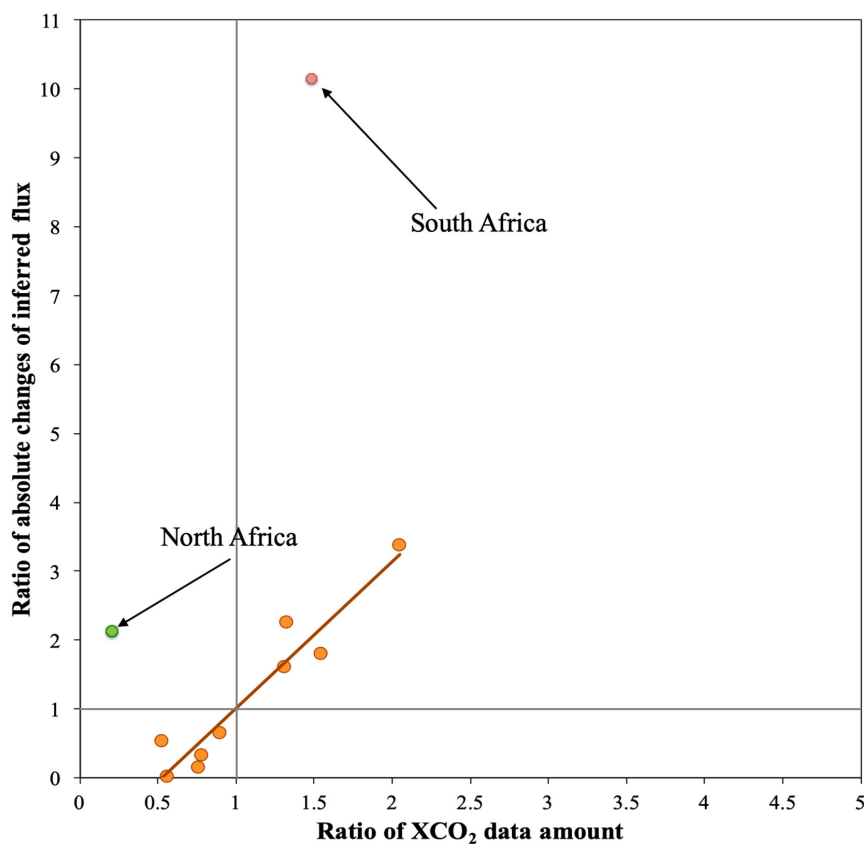

394

395 **Figure 5.** Scatter plot for the ratio of GOSAT to OCO-2 XCO<sub>2</sub> data amount versus the ratio of abso-  
396 lute changes of the land sinks caused by GOSAT to OCO-2 in the 11 TRANSCOM land regions  
397

### 398 4.3 Evaluation for the inversion results

#### 399 4.3.1 Flask observations

400 We use flask observations from 47 surface sites (Figure 2) to evaluate the posterior fluxes. The  
401 GEOS-Chem model is driven with the prior flux and the two posterior fluxes to obtain the prior and  
402 posterior CO<sub>2</sub> mixing ratios. The simulated CO<sub>2</sub> mixing ratios are sampled at each observation site  
403 and within half an hour of observation time. Figure 6 shows a summary of comparisons of the simu-  
404 lated CO<sub>2</sub> mixing ratio against the flask measurements. The mean difference between the prior CO<sub>2</sub>  
405 mixing ratio and the flask measurements is 1.14 ppm, with a standard deviation of 2.73 ppm. Using



406 posterior fluxes inferred from GOSAT and OCO-2 data, the mean differences between the posterior  
407 CO<sub>2</sub> mixing ratio and flask measurements are reduced to -0.32 and 0.48 ppm, with a standard devia-  
408 tion of 2.59 and 2.79 ppm, respectively. It is noted that the mean difference in the posterior CO<sub>2</sub>  
409 mixing ratio between GOSAT and OCO-2 inversions at 47 observation sites is 0.8 ppm, much larger  
410 than the 0.26 ppm (0.56 Pg C/2.12 Pg C/ppm=0.26 ppm) difference between their global net flux  
411 estimates, indicating the relatively large difference in posterior flux between these two inversions at  
412 the regional scale. Figure 7 shows the biases at each observation site in different latitudes. It could be  
413 found that the biases between the simulations and the observations in the northern hemisphere are  
414 significantly larger than those in southern hemisphere since the carbon flux distribution of the north-  
415 ern hemisphere is more complex than that of the southern hemisphere. When the prior flux is used,  
416 almost all sites in the northern hemisphere have significant positive deviations, with an average of  
417 1.7 ppm, while in the southern hemisphere, the deviations are very small, with an average bias of  
418 only 0.08 ppm; when using the posterior flux of OCO-2, the deviations in most northern hemisphere  
419 sites are significantly reduced, with the average deviation falling to half the original, to 0.85 ppm,  
420 while in the southern hemisphere, at most sites, the biases increase by variable amounts, with a mean  
421 of -0.13 ppm; when using the posterior flux of GOSAT, the deviations are further reduced to -0.04  
422 ppm in the northern hemisphere but further increased to -0.55 ppm in the southern hemisphere. These  
423 suggest that GOSAT and OCO-2 data can effectively improve the carbon fluxes estimate in the north-  
424 ern hemisphere, but overestimate the land sinks in the southern hemisphere, especially for GOSAT.  
425

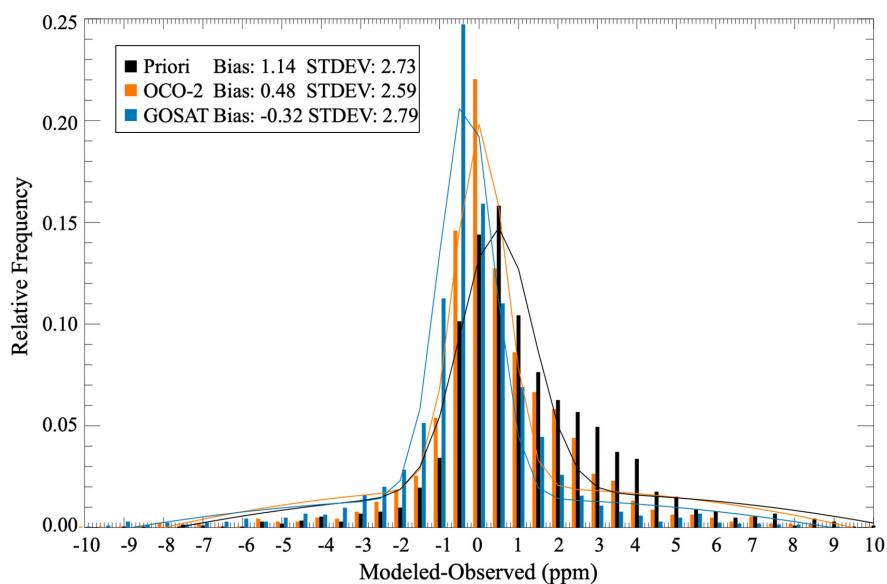

426

427 **Figure 6.** Statistical distribution of the modeled and observed mismatch errors in 47 surface flask  
428 sites

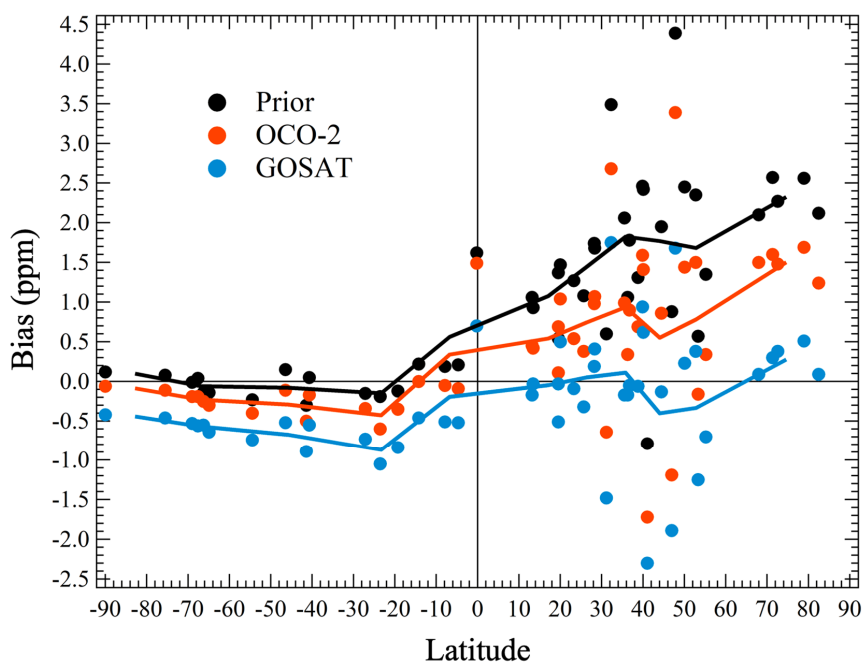

429

430 **Figure 7.** Biases of the simulated CO<sub>2</sub> mixing ratios against the flask measurements in different lat-  
431 itudes (positive/negative biases represent modeled concentration being greater/less than the ob-  
432 served)



#### 433 4.3.2 TCCON observations

434 We also use ground XCO<sub>2</sub> observations from 13 TCCON sites (Figure 2) to evaluate our inver-  
435 sion results. The simulated CO<sub>2</sub> concentrations at 47 vertical levels are mapped into 71 TCCON  
436 levels. Following the approach of Wunch et al. (2011), using prior profiles and the averaging kernel  
437 from the TCCON dataset, we calculated the modeled XCO<sub>2</sub> values at 13 TCCON sites. Figure 6  
438 shows the comparison of modeled XCO<sub>2</sub> with TCCON observations. The mean difference between  
439 prior XCO<sub>2</sub> and TCCON observations is 1.37 ppm, with a standard deviation of 1.25 ppm. Through  
440 OCO-2 inversion, the mean difference between modeled and observed XCO<sub>2</sub> is slightly reduced to  
441 0.93 ppm, with a standard deviation of 1.07 ppm, and through GOSAT inversion, the mean differ-  
442 ence between modeled and observed XCO<sub>2</sub> is significantly reduced to 0.04 ppm with a standard de-  
443 viation of 1.09 ppm. Figure 9 shows the bias at each TCCON site. Obviously, the biases at all  
444 TCCON sites are positive when using the prior fluxes, ranging between 0.3 and 2.6 ppm. The bi-  
445 ases at the sites in the northern temperate and boreal areas are all above 1.5 ppm except for the La-  
446 mont site. After using the posterior fluxes of OCO-2, the biases of all sites are reduced by 30%. Af-  
447 ter using the posteriori fluxes of GOSAT, the biases are significantly reduced, ranging between -  
448 0.48 and 1.03 ppm. For two of the three TCCON sites in the southern hemisphere, the biases are  
449 changed to negative values when using the posteriori fluxes from GOSAT data, further indicating  
450 the overestimation of carbon sinks by GOSAT data in the southern hemisphere.

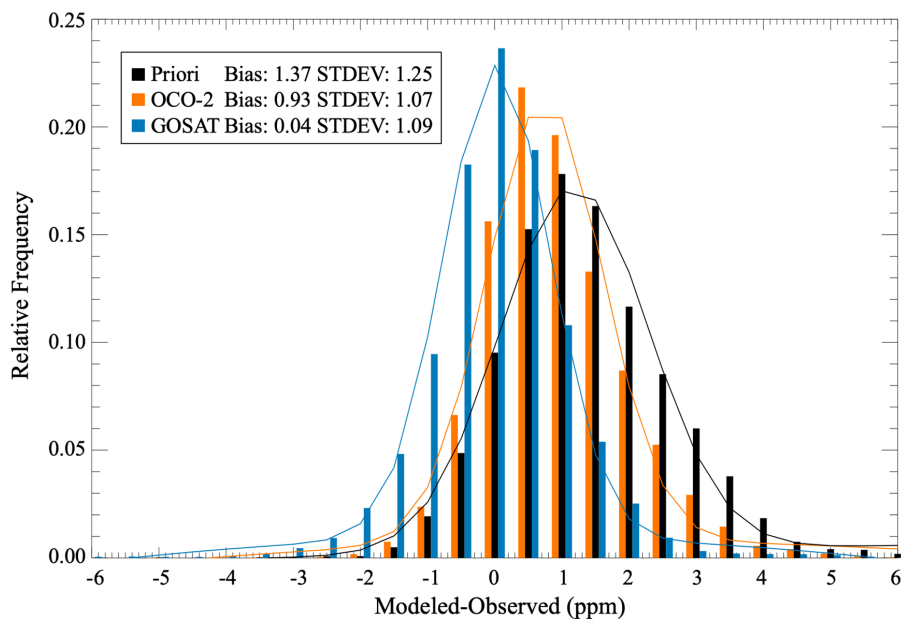

451

452 **Figure 8.** Statistical distributions of modeled and observed mismatch errors at 13 TCCON sites

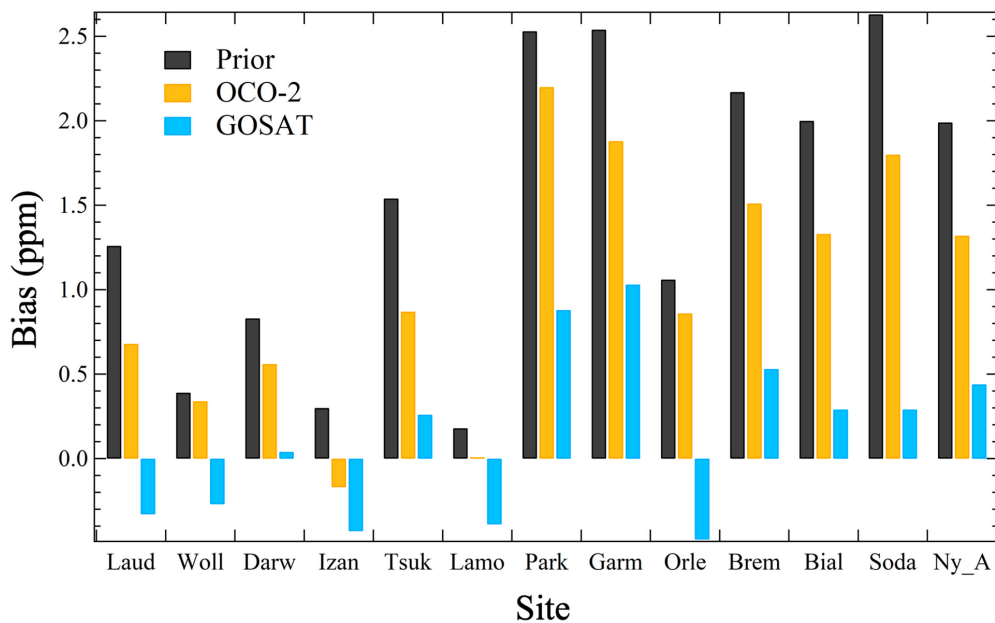

453

454 **Figure 9.** The biases between the modeled and observed XCO<sub>2</sub> at the 13 TCCON sites

455





## 456 5. Summary and Conclusions

457 In this study, we use both GOSAT and OCO-2 XCO<sub>2</sub> retrievals to constrain terrestrial ecosys-  
458 tem carbon fluxes from Oct 1, 2014 to Dec 31, 2015, using a 4D-Var system within the GEOS-Chem  
459 adjoint model. The posterior carbon fluxes estimated from GOSAT and OCO-2 data at both global  
460 and regional scales during Jan 1 to Dec 31, 2015 are shown and discussed. Surface CO<sub>2</sub> mixing ratios  
461 from 47 surface flask sites and XCO<sub>2</sub> observations from 13 TCCON sites are used to evaluate the  
462 inversions of carbon fluxes using GOSAT and OCO-2 data.

463 Globally, the land net flux (including fossil fuel and biomass burning emissions) inferred from  
464 GOSAT and OCO-2 XCO<sub>2</sub> retrievals are larger than the prior value, and lower than the estimate of  
465 CT2016, but much closer to the estimate of GCP 2017. The terrestrial ecosystem carbon sink (ex-  
466 cluding biomass burning emissions) estimated from GOSAT data is stronger than that inferred from  
467 OCO-2 data, and the annual atmospheric CO<sub>2</sub> growth rate (global net flux) estimated based on GO-  
468 SAT data is more consistent with the GCP estimate than that based on OCO-2. Regionally, in most  
469 regions, the land sinks inverted based on GOSAT data are also stronger than those inferred from  
470 OCO-2 data. Compared with the prior fluxes, ~~basically~~, the inferred land sinks are significantly in-  
471 creased in northern and southern temperate regions, and decreased in tropical regions. In addition,  
472 the inferred carbon fluxes have the largest changes in Northern Temperate regions, followed by Trop-  
473 ical and Southern Temperate regions, and the weakest in boreal regions. The different impact of XCO<sub>2</sub>  
474 on the carbon fluxes in different regions are mainly related to the spatial coverage and the amount of  
475 XCO<sub>2</sub> data. Generally, a larger amount of XCO<sub>2</sub> data in a region is corresponding to a larger change  
476 in the inverted carbon flux in the same region. Compared with the CT2016 results, the carbon sinks  
477 optimized using XCO<sub>2</sub> in this study are comparable with CT2016 in most temperate regions, but  
478 much weaker than CT2016 in the boreal and tropical regions.

479 Evaluations of the inversions using CO<sub>2</sub> concentrations from flask and TCCON measurements  
480 showed that both posterior carbon fluxes of OCO-2 and GOSAT could significantly improve the



481 modeling of atmospheric CO<sub>2</sub> concentrations, and both the simulated surface CO<sub>2</sub> mixing ratio and  
482 XCO<sub>2</sub> concentrations with GOSAT posterior fluxes are much closer to the observations than those  
483 with OCO-2. Generally, in the northern hemisphere, the deviations are significantly reduced, while  
484 in the southern hemisphere, the biases are elevated to a certain extent. These suggest that GOSAT and  
485 OCO-2 data can effectively improve the carbon fluxes estimate in the northern hemisphere, while in  
486 the southern hemisphere and some northern temperate regions, the optimized carbon sinks may be  
487 overestimated.

#### 488 **Author contributions**

489 FJ and HW designed the research, HW conducted inverse modeling, HW and FJ conducted data anal-  
490 ysis and wrote the paper, JW, WJ and JC participated in the discussion of the results and provided  
491 input on the paper for revision before submission.

#### 492 **Competing interests**

493 The authors declare that they have no conflict of interest.

#### 494 **Acknowledgements**

495 This work is supported by the National Key R&D Program of China (Grant No: 2016YFA0600204), National  
496 Natural Science Foundation of China (Grant No: 41571452), and the Fundamental Research Funds for the  
497 Central Universities (Grant No: 090414380021).

498

#### 499 **References**

- 500 Andres, R. J., Gregg, J. S., Losey, L., Marland, G. and Boden, T. A.: Monthly, global emissions of carbon  
501 dioxide from fossil fuel consumption. *Tellus B*, 63(3), 309–327, [https://doi.org/10.1111/j.1600-](https://doi.org/10.1111/j.1600-0889.2011.00530.x)  
502 [0889.2011.00530.x](https://doi.org/10.1111/j.1600-0889.2011.00530.x), 2011.
- 503 Baker, D. F., Bösch, H., Doney, S. C., O'Brien, D., and Schimel, D. S.: Carbon source/sink information pro-  
504 vided by column CO<sub>2</sub> measurements from the Orbiting Carbon Observatory, *Atmos. Chem. Phys.*, 10,  
505 4145–4165, <https://doi.org/10.5194/acp-10-4145-2010>, 2010.
- 506 Basu, S., Guerlet, S., Butz, A., Houweling, S., Hasekamp, O., Aben, I., Krummel, P., Steele, P., Langenfelds,  
507 R., Torn, M., Biraud, S., Stephens, B., Andrews, A., and Worthy, D.: Global CO<sub>2</sub> fluxes estimated from  
508 GOSAT retrievals of total column CO<sub>2</sub>, *Atmos. Chem. Phys.*, 13, 8695–8717,  
509 <https://doi.org/10.5194/acp-13-8695-2013>, 2013.

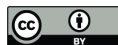

- 510 Basu, S., Krol, M., Butz, A., Clerbaux, C., Sawa, Y., Machida, T., Matsueda, H., Frankenberg, C., Hasekamp,  
511 O. P., and Aben, I.: The seasonal variation of the CO<sub>2</sub> flux over Tropical Asia estimated from GOSAT,  
512 CONTRAIL, and IASI, *Geophys. Res. Lett.*, 41, 1809–1815, <https://doi.org/10.1002/2013GL059105>,  
513 2014.
- 514 Blumenstock, T., Hase, F., Schneider, M., García, O.E., and Sepúlveda, E.: TCCON data from Izana, Tene-  
515 rife, Spain, Release GGG2014R1. TCCON data archive, hosted by CaltechDATA, California Institute of  
516 Technology, Pasadena, CA, U.S.A. <https://doi.org/10.14291/tcon.ggg2014.izana01.R1>, 2017.
- 517 Byrd, R. H., Nocedal, J. and Schnabel, R. B.: Representations of Quasi-Newton Matrices and their use in  
518 Limited Memory Methods. *Math Program.* 63(4), 129–156. <https://doi.org/10.1007/BF01582063>, 1994.
- 519 Chatterjee, A., Gierach, M. M., Sutton, A. J., Feely, R. A., Crisp, D., Eldering, A., Gunson, M. R., O'Dell, C.  
520 W., Stephens, B. B., and Schimel, D. S.: Influence of El Niño on atmospheric CO<sub>2</sub> over the tropical Pa-  
521 cific Ocean: Find- ings from NASA's OCO-2 mission, *Science*, 358, eaam5776,  
522 <https://doi.org/10.1126/science.aam5776>, 2017.
- 523 Chevallier, F., Bron, F.-M., and Rayner, P. J.: Contribution of the Orbiting Carbon Observatory to the estima-  
524 tion of CO<sub>2</sub> sources and sinks: Theoretical study in a variational data assimilation framework, *J. Geophys.*  
525 *Res.-Atmos.*, 112, d09307, <https://doi.org/10.1029/2006JD007375>, 2007.
- 526 Chevallier, F., Feng, L., Bösch, H., Palmer, P. I., and Rayner, P. J.: On the impact of transport model errors  
527 for the estimation of CO<sub>2</sub> surface fluxes from GOSAT observations, *Geophys. Res. Lett.*, 37, L21803,  
528 <https://doi.org/10.1029/2010GL044652>, 2010.
- 529 Chevallier, F., Palmer, P. I., Feng, L., Boesch, H., O'Dell, C. W., and Bousquet, P.: Toward robust and con-  
530 sistent regional CO<sub>2</sub> flux estimates from in situ and spaceborne measurements of atmospheric CO<sub>2</sub>, *Ge-*  
531 *ophys. Res. Lett.*, 41, 1065–1070, <https://doi.org/10.1002/2013GL058772>, 2014.
- 532 Corbett, J. J., and Koehler, H. W.: Updated emissions from ocean shipping, *J. Geophys. Res.*, 108, 4650,  
533 <https://doi.org/10.1029/2003JD003751>, D20, 2003.
- 534 Conway, T. J., Tans, P. P., Waterman, L. S., Thoning, K. W., Kitzis, D. R., Masarie, K. A., and Zhang, N.: Ev-  
535 idence for interannual variability of the carbon cycle from the National Oceanic and Atmospheric Admin-  
536 istration/Climate Monitoring and Diagnostics Laboratory Global Air Sampling Network, *J. Geophys.*  
537 *Res.*, 99, 22831–22855, <https://doi.org/10.1029/94JD01951>, 1994.
- 538 Crisp, D., Pollock, H. R., Rosenberg, R., Chapsky, L., Lee, R. A. M., Oyafuso, F. A., Frankenberg, C.,  
539 O'Dell, C. W., Bruegge, C. J., Doran, G. B., Eldering, A., Fisher, B. M., Fu, D., Gunson, M. R., Man-  
540 drake, L., Osterman, G. B., Schwandner, F. M., Sun, K., Taylor, T. E., Wennberg, P. O., and Wunch, D.:  
541 The on-orbit performance of the Orbiting Carbon Observatory-2 (OCO-2) instrument and its radiometri-  
542 cally calibrated products, *Atmos. Meas. Tech.*, 10, 59–81, <https://doi.org/10.5194/amt-10-59-2017>, 2017.
- 543 Deng, F. and Chen, J. M.: Recent global CO<sub>2</sub> flux inferred from atmospheric CO<sub>2</sub> observations and its re-  
544 gional analyses, *Biogeo- sciences*, 8, 3263–3281, <https://doi.org/10.5194/bg-8-3263-2011>, 2011.
- 545 Deng, F., Jones, D. B. A., Henze, D. K., Bousserez, N., Bowman, K. W., Fisher, J. B., Nassar, R., O'Dell, C.,  
546 Wunch, D., Wennberg, P. O., Kort, E. A., Wofsy, S. C., Blumenstock, T., Deutscher, N. M., Griffith, D. W.  
547 T., Hase, F., Heikkinen, P., Sherlock, V., Strong, K., Sussmann, R., and Warneke, T.: Inferring regional  
548 sources and sinks of atmospheric CO<sub>2</sub> from GOSAT XCO<sub>2</sub> data, *Atmos. Chem. Phys.*, 14, 3703–3727,  
549 <https://doi.org/10.5194/acp-14-3703-2014>, 2014.
- 550 Deng, F., Jones, D. B. A., O'Dell, C. W., Nassar, R., and Parazoo, N. C.: Combining GOSAT XCO<sub>2</sub> observa-  
551 tions over land and ocean to improve regional CO<sub>2</sub> flux estimates, *J. Geophys. Res. Atmos.*, 121, 1896–  
552 1913, <https://doi.org/10.1002/2015JD024157>, 2016.
- 553 Deutscher, N., Notholt, J., Messerschmidt, J., Weinzierl, C., Warneke, T., Petri, C., Grupe, P., and Katrynski,  
554 K.: TCCON data from Bialystok, Poland, Release GGG2014R1. TCCON data archive, hosted by Cal-  
555 techDATA, California Institute of Technology, Pasadena, CA, U.S.A.  
556 <http://doi.org/10.14291/tcon.ggg2014.bialystok01.R1/1183984>, 2017.
- 557 Eldering, A., Boland, S., Solish, B., Crisp, D., Kahn, P., and Gunson, M.: High precision atmospheric CO<sub>2</sub>

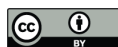

- 558 measurements from space: The design and implementation of OCO-2, in: 2012 IEEE Aerospace Confer-  
559 ence, 1–10, <https://doi.org/10.1109/AERO.2012.6187176>, 2012.
- 560 Eldering, A., O'Dell, C. W., Wennberg, P. O., Crisp, D., Gunson, M. R., Viatte, C., Avis, C., Braverman, A.,  
561 Castano, R., Chang, A., Chapsky, L., Cheng, C., Connor, B., Dang, L., Doran, G., Fisher, B., Frankenberg,  
562 C., Fu, D., Granat, R., Hobbs, J., Lee, R. A. M., Mandrake, L., McDuffie, J., Miller, C. E., Myers, V., Natraj,  
563 V., O'Brien, D., Osterman, G. B., Oyafuso, F., Payne, V. H., Pollock, H. R., Polonsky, I., Roehl, C. M.,  
564 Rosenberg, R., Schwandner, F., Smyth, M., Tang, V., Taylor, T. E., To, C., Wunch, D., and Yoshimizu, J.:  
565 The Orbiting Carbon Observatory-2: first 18 months of science data products, *Atmos. Meas. Tech.*, 10,  
566 549–563, <https://doi.org/10.5194/amt-10-549-2017>, 2017a.
- 567 Eldering, A., Wennberg, P. O., Crisp, D., Schimel, D. S., Gunson, M. R., Chatterjee, A., Liu, J., Schwand-  
568 ner, F. M., Sun, Y., O'Dell, C. W., Frankenberg, C., Taylor, T., Fisher, B., Osterman, G. B., Wunch, D.,  
569 Hakkarainen, J., Tamminen, J., and Weir, B.: The Orbiting Carbon Observatory-2 early science investiga-  
570 tions of regional carbon dioxide fluxes, *Science*, 358, eaam5745, <https://doi.org/10.1126/sci->  
571 [ence.aam5745](https://doi.org/10.1126/science.aam5745), 2017b.
- 572 Endresen, Ø., Sørgård, E., Behrens, H. L., Brett, P. O., and Isaksen, I. S. A.: A historical reconstruction of  
573 ships' fuel consumption and emissions, *J. Geophys. Res.*, 112, D12301,  
574 <https://doi.org/10.1029/2006JD007630>, 2007.
- 575 Feng, L., Palmer, P. I., Parker, R. J., Deutscher, N. M., Feist, D. G., Kivi, R., Morino, I., and Sussmann, R.:  
576 Estimates of European uptake of CO<sub>2</sub> inferred from GOSAT XCO<sub>2</sub> retrievals: Sensitivity to measurement  
577 bias inside and outside Europe. *Atmos. Chem. Phys.*, 16, 1289–1302, <https://doi.org/10.5194/acp-16->  
578 1289-2016, 2016.
- 579 Giglio, L., Randerson, J. T., and van der Werf, G. R.: Analysis of daily, monthly, and annual burned area us-  
580 ing the fourth-generation global fire emissions database (GFED4) *J. Geophys. Res. Biogeosci.*, 118, 317–  
581 328, <https://doi.org/10.1002/jgrg.20042>, 2013.
- 582 Griffith, D. W. T., Deutscher, N., Velazco, V. A., Wennberg, P. O., Yavin, Y., Keppel Aleks, G.,  
583 Washenfelder, R., Toon, G. C., Blavier, J.-F., Murphy, C., Jones, N., Kettlewell, G., Connor,  
584 B., Macatangay, R., Roehl, C., Ryzcek, M., Glowacki, J., Culgan, T., and Bryant, G.: TCCON  
585 data from Darwin, Australia, Release GGG2014R0. TCCON data archive, hosted by Cal-  
586 techDATA, California Institute of Technology, Pasadena, CA, U.S.A.  
587 <http://doi.org/10.14291/tcon.ggg2014.darwin01.R0/1149290>, 2017a.
- 588 Griffith, D. W. T., Velazco, V. A., Deutscher, N., Murphy, C., Jones, N., Wilson, S., Macatangay,  
589 R., Kettlewell, G., Buchholz, R. R., and Riggensbach, M.: TCCON data from Wollongong,  
590 Australia, Release GGG2014R0. TCCON data archive, hosted by CaltechDATA, California  
591 Institute of Technology, Pasadena, CA, U.S.A. <https://doi.org/10.14291/tcon.ggg2014.wol->  
592 [longong01.R0/1149291](https://doi.org/10.14291/tcon.ggg2014.wollongong01.R0/1149291), 2017b.
- 593 Henze, D. K., Hakami, A. and Seinfeld, J. H.: Development of the adjoint of GEOS-Chem, *Atmos. Chem.*  
594 *Phys.*, 7, 2413–2433, 2007.
- 595 Heymann, J., Reuter, M., Buchwitz, M., Schneising, O., Bovensmann, H., Burrows, J. P., Massart, S., Kai-  
596 ser, J. W., and Crisp, D.: CO<sub>2</sub> emission of Indonesian fires in 2015 estimated from satellite-derived atmos-  
597 pheric CO<sub>2</sub> concentrations, *Geophys. Res. Lett.*, 44, 1537–1544, <https://doi.org/10.1002/2016GL072042>,  
598 2017.
- 599 Houweling, S., Breon, F.-M., Aben, I., Rødenbeck, C., Gloor, M., Heimann, M., and Ciais, P.: Inverse mod-  
600 eling of CO<sub>2</sub> sources and sinks using satellite data: a synthetic inter-comparison of measurement tech-  
601 niques and their performance as a function of space and time, *Atmos. Chem. Phys.*, 4, 523–538,  
602 <https://doi.org/10.5194/acp-4-523-2004>, 2004.
- 603 Houweling, S., Aben, I., Breon, F.-M., Chevallier, F., Deutscher, N., Engelen, R., Gerbig, C., Griffith, D.,  
604 Hungershofer, K., Macatangay, R., Marshall, J., Notholt, J., Peters, W., and Serrar, S.: The importance of  
605 transport model uncertainties for the estimation of CO<sub>2</sub> sources and sinks using satellite measurements,  
606 *Atmos. Chem. Phys.*, 10, 9981–9992, <https://doi.org/10.5194/acp-10-9981-2010>, 2010.
- 607

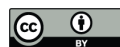

- 608 Houweling, S., Baker, D., Basu, S., Boesch, H., Butz, A., Cheval-  
609 L., Ganshin, A., Hasekamp, O., Jones, D., Maksyutov, S., Marshall, J., Oda, T., O'Dell, C. W.,  
610 Oshchepkov, S., Palmer, P. I., Peylin, P., Poussi, Z., Reum, F., Takagi, H., Yoshida, Y., and Zhuravlev, R.:  
611 An intercomparison of inverse models for estimating sources and sinks of CO<sub>2</sub> using GOSAT measure-  
612 ments, *J. Geophys. Res.-Atmos.*, 120, 5253–5266, <https://doi.org/10.1002/2014JD022962>, 2015.
- 613 Hungershofer, K., Breon, F.-M., Peylin, P., Chevallier, F., Rayner, P., Klonecki, A., Houweling, S., and Mar-  
614 shall, J.: Evaluation of various observing systems for the global monitoring of CO<sub>2</sub> surface fluxes, *Atmos.*  
615 *Chem. Phys.*, 10, 10503–10520, <https://doi.org/10.5194/acp-10-10503-2010>, 2010.
- 616 Jiang, Z., Jones, D. B. A., Kopacz, M., Liu, J., Henze, D. K., and Heald, C.: Quantifying the impact of model  
617 errors on top-down estimates of carbon monoxide emissions using satellite observations, *J. Geophys.*  
618 *Res.*, 116, D15306, <https://doi.org/10.1029/2010JD015282>, 2011.
- 619 Kim, B. Y., Fleming, G. G., Lee, J. J., Waitz, I. A., Clarke, J.-P., Balasubramanian, S., Malwitz, A., Klima,  
620 K., Locke, M., Holsclaw, C. A., Maurice, L. Q., Gupta, M. L.: System for assessing Aviation's Global  
621 Emissions (SAGE), Part 1: Model description and inventory results, *Transportation Research Part D:*  
622 *Transport and Environment*, 12(5), 325-346, <https://doi.org/10.1016/j.trd.2007.03.007>, 2007.
- 623 Kim, J., Kim, H. M., Cho, C.-H., Boo, K.-O., Jacobson, A. R., Sasakawa, M., Machida, T., Arshinov, M., and  
624 Fedoseev, N.: Impact of Siberian observations on the optimization of surface CO<sub>2</sub> flux, *Atmos. Chem.*  
625 *Phys.*, 17, 2881-2899, <https://doi.org/10.5194/acp-17-2881-2017>, 2017.
- 626 Kivi, R., Heikkinen, P., and Kyro, E.: TCCON data from Sodankyla, Finland, Release  
627 GGG2014R0. TCCON data archive, hosted by CaltechDATA, California Institute of Technol-  
628 ogy, Pasadena, CA, U.S.A. <https://doi.org/10.14291/tcon.ggg2014.sodankyla01.R0/1149280>,  
629 2017.
- 630 Kopacz, M., Jacob, D. J., Henze, D. K., Heald, C. L., Streets, D. G., and Zhang, Q.: A comparison of analyti-  
631 cal and adjoint Bayesian inversion methods for constraining Asian sources of CO using satellite  
632 (MOPITT) measurements of CO columns, *J. Geophys. Res.*, 114, D04305,  
633 <https://doi.org/10.1029/2007JD009264>, 2009.
- 634 Kopacz, M., Jacob, D. J., Fisher, J. A., Logan, J. A., Zhang, L., Megretskaia, I. A., Yantosca, R. M., Singh, K.,  
635 Henze, D. K., Burrows, J. P., Buchwitz, M., Khlystova, I., McMillan, W. W., Gille, J. C., Edwards, D. P.,  
636 Eldering, A., Thouret, V., and Nedelec, P.: Global estimates of CO sources with high resolution by adjoint  
637 inversion of multiple satellite datasets (MOPITT, AIRS, SCIAMACHY, TES), *Atmos. Chem. Phys.*, 10,  
638 855-876, 2010.
- 639 Kuze, A., Suto, H., Nakajima, M., and Hamazaki, T.: Thermal and near infrared sensor for carbon observa-  
640 tion Fourier-transform spectrometer on the Greenhouse Gases Observing Satellite for greenhouse gases  
641 monitoring. *Appl. Opt.*, 48, 6716, <https://doi.org/10.1364/AO.48.006716>, 2009.
- 642 Le Quéré, C., Andrew, R. M., Friedlingstein, P., Sitch, S., Pongratz, J., Manning, A. C., Korsbakken, J. I.,  
643 Peters, G. P., Canadell, J. G., Jackson, R. B., Boden, T. A., Tans, P. P., Andrews, O. D., Arora, V. K., Bak-  
644 ker, D. C. E., Barbero, L., Becker, M., Betts, R. A., Bopp, L., Chevallier, F., Chini, L. P., Ciais, P., Cosca,  
645 C. E., Cross, J., Currie, K., Gasser, T., Harris, I., Hauck, J., Haverd, V., Houghton, R. A., Hunt, C. W.,  
646 Hurtt, G., Ilyina, T., Jain, A. K., Kato, E., Kautz, M., Keeling, R. F., Klein Goldewijk, K., Körtzinger, A.,  
647 Landschützer, P., Lefèvre, N., Lenton, A., Lienert, S., Lima, I., Lombardozzi, D., Metzl, N., Millero, F.,  
648 Monteiro, P. M. S., Munro, D. R., Nabel, J. E. M. S., Nakaoka, S.-I., Nojiri, Y., Padin, X. A., Pregon, A.,  
649 Pfeil, B., Pierrot, D., Poulter, B., Rehder, G., Reimer, J., Rödenbeck, C., Schwinger, J., Séférian, R.,  
650 Skjelvan, I., Stocker, B. D., Tian, H., Tilbrook, B., Tubiello, F. N., van der Laan-Luijckx, I. T., van der  
651 Werf, G. R., van Heuven, S., Viovy, N., Vuichard, N., Walker, A. P., Watson, A. J., Wiltshire, A. J.,  
652 Zaehle, S., and Zhu, D.: Global Carbon Budget 2017, *Earth Syst. Sci. Data*, 10, 405-448,  
653 <https://doi.org/10.5194/essd-10-405-2018>, 2018.
- 654 Liu, J., Bowman, K. W., Lee, M., Henze, D. K., Bousserez, N., Brix, H., Collatz, G. J., Menemenlis, D., Ott,  
655 L., Pawson, S., Jones, D., and Nassar, R.: Carbon monitoring system flux estimation and attribution: im-  
656 pact of ACOS-GOSAT XCO<sub>2</sub> sampling on the inference of terrestrial biospheric sources and sinks, *Tellus*  
657 *B*, 66, 22486, <https://doi.org/10.3402/tellusb.v66.22486>, 2014.



- 658 Liu, J., Bowman, K. W., Schimel, D. S., Parazoo, N. C., Jiang, Z., Lee, M., Bloom, A. A., Wunch, D., Frank-  
659 enberg, C., Sun, Y., O'Dell, C. W., Gurney, K. R., Menemenlis, D., Gierach, M., Crisp, D., and Eldering,  
660 A.: Contrasting carbon cycle responses of the tropical continents to the 2015–2016 El Niño, *Science*, 358,  
661 eaam5690, <https://doi.org/10.1126/science.aam5690>, 2017.
- 662 Maksyutov, S., Takagi, H., Valsala, V. K., Saito, M., Oda, T., Sasaki, T., Belikov, D. A., Saito, R., Ito, A., Yo-  
663 shida, Y., Morino, I., Uchino, O., Andres, R. J., and Yokota, T.: Regional CO<sub>2</sub> flux estimates for 2009–  
664 2010 based on GOSAT and ground- based CO<sub>2</sub> observations, *Atmos. Chem. Phys.*, 13, 9351–9373,  
665 <https://doi.org/10.5194/acp-13-9351-2013>, 2013.
- 666 Miller, C. E., Crisp, D., DeCola, P. L., Olsen, S. C., Randerson, J. T., Michalak, A. M., Alkhaled, A., Rayner,  
667 P., Jacob, D. J., Suntharalingam, P., Jones, D. B. A., Denning, A. S., Nicholls, M. E., Doney, S. C., Paw-  
668 son, S., Boesch, H., Connor, B. J., Fung, I. Y., O'Brien, D., Salawitch, R. J., Sander, S. P., Sen, B., Tans,  
669 P., Toon, G. C., Wennberg, P. O., Wofsy, S. C., Yung, Y. L., and Law, R. M.: Precision requirements for  
670 space-based XCO<sub>2</sub> data, *J. Geophys. Res.*, 112, D10314, <https://doi.org/10.1029/2006JD007659>, 2007.
- 671 Miller, S. M., Michalak, A. M., Yadav, V., and Tadić, J. M.: Characterizing biospheric carbon balance using  
672 CO<sub>2</sub> observations from the OCO-2 satellite, *Atmos. Chem. Phys.*, 18, 6785–6799,  
673 <https://doi.org/10.5194/acp-18-6785-2018>, 2018.
- 674 Morino, I., Matsuzaki, T., and Shishime, A.: TCCON data from Tsukuba, Ibaraki, Japan, 125HR,  
675 Release GGG2014R2. TCCON data archive, hosted by CaltechDATA, California Institute of  
676 Technology, Pasadena, CA, U.S.A. <http://doi.org/10.14291/tcon.ggg2014.tsukuba02.R2>,  
677 2017.
- 678 Nassar, R., Jones, D. B. A., Suntharalingam, P., Chen, J. M., Andres, R. J., Wecht, K. J., Yantosca, R. M., Ku-  
679 lawik, S. S., Bowman, K. W., Worden, J. R., Machida, T., and Matsueda, H.: Modeling global atmos-  
680 pheric CO<sub>2</sub> with improved emission inventories and CO<sub>2</sub> production from the oxidation of other carbon  
681 species, *Geosci. Model Dev.*, 3, 689–716, <https://doi.org/10.5194/gmd-3-689-2010>, 2010.
- 682 Nassar, R., Hill, T. G., McLinden, C. A., Wunch, D., Jones, D. B. A., and Crisp, D.: Quantifying CO<sub>2</sub> emis-  
683 sions From Individual Power Plants from Space, *Geophys. Res. Lett.*, 44, 10045– 10053,  
684 <https://doi.org/10.1002/2017GL074702>, 2017.
- 685 Notholt, J., Petri, C., Warneke, T., Deutscher, N., Buschmann, M., Weinzierl, C., Macatangay,  
686 R., and Grupe, P.: TCCON data from Bremen, Germany, Release GGG2014R0. TCCON data  
687 archive, hosted by CaltechDATA, California Institute of Technology, Pasadena, CA, U.S.A.  
688 <https://doi.org/10.14291/tcon.ggg2014.bremen01.R0/1149275>, 2017a.
- 689 Notholt, J., Schrems, O., Warneke, T., Deutscher, N., Weinzierl, C., Palm, M., Buschmann, M.,  
690 and AWI-PEV Station Engineers: TCCON data from Ny Alesund, Spitzbergen, Norway, Re-  
691 lease GGG2014R0. TCCON data archive, hosted by CaltechDATA, California Institute of  
692 Technology, Pasadena, CA, U.S.A. <https://doi.org/10.14291/tcon.ggg2014.nyale->  
693 [sund01.R0/1149278](https://doi.org/10.14291/tcon.ggg2014.nyalesund01.R0/1149278), 2017b.
- 694 O'Dell, C., Connor, B., Bösch, H., O'Brien, D., Frankenberg, C., Castano, R., Christi, M., Eldering, D.,  
695 Fisher, B., Gunson, M., McDuffie, J., Miller, C. E., Natraj, V., Oyafuso, F., Polonsky, I., Smyth, M., Tay-  
696 lor, T., Toon, G., Wennberg, P., and Wunch, D.: The ACOS CO<sub>2</sub> retrieval algorithm – Part 1: Description  
697 and validation against synthetic observations, *Atmos. Meas. Tech.*, 5, 99–121, <https://doi.org/10.5194/amt->  
698 [5-99-2012](https://doi.org/10.5194/amt-5-99-2012), 2012.
- 699 Park, B. C. and Prather, M. J.: CO<sub>2</sub> source inversions using satellite observations of the upper troposphere,  
700 *Geophys. Res. Lett.*, 28, 4571–4574, <https://doi.org/10.1029/2001GL013604>, 2001.
- 701 Parrington, M., Palmer, P. I., Henze, D. K., Tarasick, D. W., Hyer, E. J., Owen, R. C., Clerbaux, C., Bowman,  
702 K. W., Deeter, M. N., Barratt, E. M., Coheur, P.-F., Hurtmans, D., George, M., and Worden, J. R.: The in-  
703 fluence of boreal biomass burning emissions on the distribution of tropospheric ozone over North Amer-  
704 ica and the North Atlantic during 2010, *Atmos. Chem. Phys.*, 12, 2077–2098, 2012.
- 705 Patra, P. K., Crisp, D., Kaiser, J. W., Wunch, D., Sasaki, T., Ichii, K., Sekiya, T., Wennberg, P. O., Feist, D. G.,  
706 Pollard, D. F., Griffith, D. W. T., Velazco, V. A., De Maziere, M., Sha, M. K., Roehl, C., Chatterjee, A.,



- 707 and Ishijima, K.: The Orbiting Carbon Observa- tory (OCO-2) tracks 2–3 peta-gram increase in carbon  
708 release to the atmosphere during the 2014–2016 El Niño, *Sci. Rep.-UK*, 7, 13567,  
709 <https://doi.org/10.1038/s41598-017-13459-0>, 2017.
- 710 Peters, W., Jacobson, A. R., Sweeney, C., Andrews, A. E., Conway, T. J., Masarie, K., Miller, J. B., Bruh-  
711 wiler, L. M. P., P’etron, G., Hirsch, A. I., Worthy, D. E. J., Werf, G. R. V. D., Randerson, J. T., Wennberg,  
712 P. O., Krol, M. C., and Tans, P. P.: An atmospheric perspective on North American carbon dioxide ex-  
713 change: CarbonTracker, *P. Natl. Acad. Sci.*, 104, 18925–18930, 2007..
- 714 Peylin, P., Law, R. M., Gurney, K. R., Chevallier, F., Jacobson, A. R., Maki, T., Niwa, Y., Patra, P. K., Peters,  
715 W., Rayner, P. J., Rödenbeck, C., van der Laan-Luijkx, I. T., and Zhang, X.: Global atmospheric carbon  
716 budget: results from an ensemble of atmospheric CO<sub>2</sub> inversions, *Biogeosciences*, 10, 6699–6720,  
717 <https://doi.org/10.5194/bg-10-6699-2013>, 2013.
- 718 Potter, C. S., Randerson, J. T., Field, C. B., Matson, P. A., Vitousek, P. M., Mooney, H. A., and Klooster, S.  
719 A.: Terrestrial ecosystem production: A process model based on global satellite and surface data, *Global*  
720 *Biogeochem. Cycles*, 7(4), 811–841, <https://doi.org/10.1029/93GB02725>, 1993.
- 721 Rayner, P. J. and O’Brien, D. M.: The utility of remotely sensed CO<sub>2</sub> concentration data in surface source  
722 inversions, *Geophys. Res. Lett.*, 28, 175–178, <https://doi.org/10.1029/2000GL011912>, 2001.
- 723 Reuter, M., Buchwitz, M., Hilker, M., Heymann, J., Schneising, O., Pillai, D., Bovensmann, H., Burrows, J.  
724 P., Bösch, H., Parker, R., Butz, A., Hasekamp, O., O’Dell, C. W., Yoshida, Y., Gerbig, C., Nehr Korn, T.,  
725 Deutscher, N. M., Warneke, T., Notholt, J., Hase, F., Kivi, R., Sussmann, R., Machida, T., Matsueda, H.,  
726 and Sawa, Y.: Satellite-inferred European carbon sink larger than expected, *Atmos. Chem. Phys.*, 14,  
727 13739–13753, <https://doi.org/10.5194/acp-14-13739-2014>, 2014.
- 728 Reuter, M., Buchwitz, M., Hilker, M., Heymann, J., Bovensmann, H., Burrows, J. P., Houweling, S., Liu, Y.  
729 Y., Nassar, R., Chevallier, F., Ciais, P., Marshall, J., and Reichstein, M.: How Much CO<sub>2</sub> Is Taken Up by  
730 the European Terrestrial Biosphere?. *Bull. Amer. Meteor. Soc.*, 98, 665–671,  
731 <https://doi.org/10.1175/BAMS-D-15-00310.1>, 2017.
- 732 Rienecker, M. M., Suarez, M. J., Todling, R., Bacmeister, J., Takacs, L. and co-authors: The GEOS-5 Data  
733 Assimilation System-Documentation of versions 5.0.1 and 5.1.0, and 5.2.0 NASA Tech. Rep. Series on  
734 Global Modeling and Data Assimilation, NASA/TM-2008-104606, Vol. 27, 92 pp, 2008.
- 735 Rodgers, C. D.: *Inverse Methods for Atmospheric Sounding: Theory and Practice*, World Scientific Publish-  
736 ing Co Inc, Singapore, chapter 2, 2000.
- 737 Saeki, T., Maksyutov, S., Saito, M., Valsala, V., Oda, T., An- dres, R. J., Belikov, D., Tans, P., Dlugokencky,  
738 E., Yoshida, Y., Morino, I., Uchino, O., and Yokota, T.: Inverse modeling of CO<sub>2</sub> fluxes using GOSAT  
739 data and multi-year ground-based obser- vations, *SOLA*, 9, 45–50, <https://doi.org/10.2151/sola.2013-011>,  
740 2013.
- 741 Sherlock, V., Connor, B., Robinson, J., Shiona, H., Smale, D., and Pollard, D.: TCCON data from  
742 Lauder, New Zealand, 125HR, Release GGG2014R0. TCCON data archive, hosted by Cal-  
743 techDATA, California Institute of Technology, Pasadena, CA, U.S.A.  
744 <https://doi.org/10.14291/tcon.ggg2014.lauder02.R0/1149298>, 2017.
- 745 Singh, K., Jardak, M., Sandu, A., Bowman, K., Lee, M., and Jones, D.: Construction of non-diagonal back-  
746 ground error covariance matrices for global chemical data assimilation, *Geosci. Model Dev.*, 4, 299–316,  
747 <https://doi.org/10.5194/gmd-4-299-2011>, 2011.
- 748 Suntharalingam, P., Jacob, D. J., Palmer, P. I., Logan, J. A., Yantosca, R. M. and co-authors: Improved quan-  
749 tification of Chinese carbon fluxes using CO<sub>2</sub>/CO correlations in Asian outflow. *J. Geophys. Res.* 109,  
750 D18S18, <https://doi.org/10.1029/2003JD004362>, 2004.
- 751 Sussmann, R., and Rettinger, M.: TCCON data from Garmisch, Germany, Release GGG2014R2.  
752 TCCON data archive, hosted by CaltechDATA, California Institute of Technology, Pasadena,  
753 CA, U.S.A. <https://doi.org/10.14291/tcon.ggg2014.garmisch01.R2>, 2017.
- 754 Takagi, H., Saeki, T., Oda, T., Saito, M., Valsala, V., Belikov, D., Saito, R., Yoshida, Y., Morino, I., Uchino,



- 755 O., Andres, R. J., Yokota, T., and Maksyutov, S.: On the benefit of GOSAT observations to the estimation  
756 of regional CO<sub>2</sub> fluxes, SOLA, 7, 161–164, <https://doi.org/10.2151/sola.2011-041>, 2011.
- 757 Tarantola, A.: Inverse Problem Theory and Methods for Model Parameter Estimation, Soc. Industr. App.l  
758 Math., Philadelphia, PA, USA, 2004.
- 759 van der Werf, G. R., Randerson, J. T., Giglio, L., Collatz, G. J., Mu, M., Kasibhatla, P. S., Morton, D. C., De-  
760 Fries, R. S., Jin, Y., and van Leeuwen, T. T.: Global fire emissions and the contribution of deforestation,  
761 savanna, forest, agricultural, and peat fires (1997–2009), Atmos. Chem. Phys., 10, 11707–11735,  
762 <https://doi.org/10.5194/acp-10-11707-2010>, 2010.
- 763 Wang, X., Guo, Z., Huang, Y. P., Fan, H. J., and Li, W. B.: A cloud detection scheme for the Chinese carbon  
764 dioxide observation satellite (TANSAT). Adv. Atmos. Sci., 34(1), 16–25, [https://doi.org/10.1007/s00376-](https://doi.org/10.1007/s00376-016-6033-y)  
765 016-6033-y, 2017.
- 766 Warneke, T., Messerschmidt, J., Notholt, J., Weinzierl, C., Deutscher, N., Petri, C., Grupe, P.,  
767 Vuillemin, C., Truong, F., Schmidt, M., Ramonet, M., and Parmentier, E.: TCCON data from  
768 Orleans, France, Release GGG2014R0. TCCON data archive, hosted by CaltechDATA, Cali-  
769 fornia Institute of Technology, Pasadena, CA, U.S.A.  
770 <https://doi.org/10.14291/tcon.ggg2014.orleans01.R0/1149276>, 2017.
- 771 Wennberg, P. O., Roehl, C., Wunch, D., Toon, G. C., Blavier, J.-F., Washenfelder, R., Keppel-Aleks, G., Al-  
772 len, N., and Ayers, J.: TCCON data from Park Falls, Wisconsin, USA, Release GGG2014R1. TCCON  
773 data archive, hosted by CaltechDATA, California Institute of Technology, Pasadena, CA, U.S.A.  
774 <http://doi.org/10.14291/tcon.ggg2014.parkfalls01.R1>, 2017.
- 775 Wennberg, P. O., Wunch, D., Roehl, C., Blavier, J.-F., Toon, G. C., Allen, N., Dowell, P., Teske, K., Martin,  
776 C., and Martin, J.: TCCON data from Lamont, Oklahoma, USA, Release GGG2014R1. TCCON data ar-  
777 chive, hosted by CaltechDATA, California Institute of Technology, Pasadena, CA, U.S.A.  
778 <https://doi.org/10.14291/tcon.ggg2014.lamont01.R1/1255070>, 2017. Wilkerson, J. T., Jacobson, M. Z.,  
779 Malwitz, A., Balasubramanian, S., Wayson, R., Fleming, G., Naiman, A. D., and Lele, S. K.: Analysis of  
780 emission data from global commercial aviation: 2004 and 2006, Atmos. Chem. Phys., 10, 6391–6408,  
781 <https://doi.org/10.5194/acp-10-6391-2010>, 2010.
- 782 Wunch, D., Wennberg, P. O., Toon, G. C., Connor, B. J., Fisher, B., Osterman, G. B., Frankenberg, C., Man-  
783 drake, L., O'Dell, C., Ahonen, P., Biraud, S. C., Castano, R., Cressie, N., Crisp, D., Deutscher, N. M.,  
784 Eldering, A., Fisher, M. L., Griffith, D. W. T., Gunson, M., Heikkinen, P., Keppel-Aleks, G., Kyrö, E.,  
785 Lindenmaier, R., Macatangay, R., Mendonca, J., Messerschmidt, J., Miller, C. E., Morino, I., Notholt, J.,  
786 Oyafuso, F. A., Rettinger, M., Robinson, J., Roehl, C. M., Salawitch, R. J., Sherlock, V., Strong, K., Suss-  
787 mann, R., Tanaka, T., Thomp- son, D. R., Uchino, O., Warneke, T., and Wofsy, S. C.: A method for evalu-  
788 ating bias in global measurements of CO<sub>2</sub> total columns from space, Atmos. Chem. Phys., 11, 12317–  
789 12337, <https://doi.org/10.5194/acp-11-12317-2011>, 2011.
- 790 Wunch, D., Wennberg, P. O., Osterman, G., Fisher, B., Naylor, B., Roehl, C. M., O'Dell, C., Mandrake, L.,  
791 Viatte, C., Kiel, M., Griffith, D. W. T., Deutscher, N. M., Velasco, V. A., Notholt, J., Warneke, T., Petri,  
792 C., De Maziere, M., Sha, M. K., Sussmann, R., Rettinger, M., Pollard, D., Robinson, J., Morino, I.,  
793 Uchino, O., Hase, F., Blumenstock, T., Feist, D. G., Arnold, S. G., Strong, K., Mendonca, J., Kivi, R.,  
794 Heikkinen, P., Iraci, L., Podolske, J., Hillyard, P. W., Kawakami, S., Dubey, M. K., Parker, H. A., Sepul-  
795 veda, E., Garcia, O. E., Te, Y., Jeseck, P., Gunson, M. R., Crisp, D., and Eldering, A.: Comparisons of the  
796 Orbiting Carbon Observatory-2 (OCO-2) XCO<sub>2</sub> measurements with TCCON, At- mos. Meas. Tech., 10,  
797 2209–2238, [https://doi.org/10.5194/amt-](https://doi.org/10.5194/amt-10-2209-2017)  
10-2209-2017, 2017.
- 798 Yang, D. X., Liu, Y., Cai, Z. N., Chen, X., Yao, L., and Lu, D. R.: First global carbon dioxide maps produced  
799 from TanSat measurements. Adv. Atmos. Sci., 35(6), 621–623, [https://doi.org/10.1007/s00376-018-7312-](https://doi.org/10.1007/s00376-018-7312-6)  
800 6, 2018.
- 801 Zhu, C., Byrd, R. H., Lu, P. and Nocedal, J.: L-BFGS-B: algorithm 778: L-BFGS-B, FORTRAN routines for  
802 large scale bound constrained optimization. ACM Trans. Math. Softw. 23(4), 550\_560.  
803 <https://doi.org/10.1145/279232.279236>, 1997.
